# Supplementary material for: Complex regulation in a Comamonas platform for diverse aromatic carbon metabolism
Source: Springer Nature journal article supplement (doi:10.1038/s41589-022-01237-7), 2023-02-06
Supplement: MOESM1 [file 41589_2022_1237_MOESM1_ESM.pdf › 41589_2022_1237_MOESM1_ESM.pdf]

# Complex regulation in a *Comamonas* platform for diverse aromatic carbon metabolism

In the format provided by the  
authors and unedited

## **TABLE OF CONTENTS**

|                                                                                                                                                                                 |    |
|---------------------------------------------------------------------------------------------------------------------------------------------------------------------------------|----|
| Supplementary Fig. 1   Extended data for Fig. 2a. ....                                                                                                                          | 3  |
| Supplementary Fig. 2   Reductive flux from OAA contributes to fumarate pool. ....                                                                                               | 4  |
| Supplementary Fig. 3   Goodness of fit for the <sup>13</sup> C-metabolic flux analysis ....                                                                                     | 4  |
| Supplementary Fig. 4   Reaction profiles at 340 nm for the two malic enzymes. ....                                                                                              | 5  |
| Supplementary Fig. 5   Allosteric regulation of PEP synthase. ....                                                                                                              | 6  |
| Supplementary Fig. 6   Differential gene and protein expression relative to 4HB. ....                                                                                           | 6  |
| Supplementary Fig. 7   Growth rate of the three overexpression strains. ....                                                                                                    | 7  |
| Supplementary Fig. 8   Extended data for Fig. 6a. ....                                                                                                                          | 8  |
| Supplementary Fig. 9   Main activities of the selected enzymes from <i>C. testosteroni</i> . ....                                                                               | 9  |
| Supplementary Fig. 10   Sodium dodecyl sulfate–polyacrylamide gel electrophoresis (SDS–PAGE) of purified proteins. ....                                                         | 10 |
| Supplementary Fig. 11   Construction of strain AG9402 and AG9404. ....                                                                                                          | 11 |
| Supplementary Fig. 12   Construction of strain AG9493. ....                                                                                                                     | 12 |
| Supplementary Fig. 13   Construction of strain AG9480. ....                                                                                                                     | 13 |
| Supplementary Table 1   Physiological characteristics. ....                                                                                                                     | 14 |
| Supplementary Table 2   Differential gene expression in initial catabolism pathways to protocatechuate. ....                                                                    | 14 |
| Supplementary Table 3   Changes in protein abundance for the enzymes in the initial catabolism pathways to protocatechuate ....                                                 | 15 |
| Supplementary Table 4   Differential gene expression in the three putative protocatechuate cleavage pathways. ....                                                              | 16 |
| Supplementary Table 5   Changes in protein abundance for the enzymes in the three putative protocatechuate cleavage pathways. ....                                              | 17 |
| Supplementary Table 6   Protein sequence identity of ortho cleavage pathway enzymes annotated in the <i>C. testosteroni</i> and <i>P. putida</i> genomes. ....                  | 18 |
| Supplementary Table 7   Protein sequence identity of 2,3-meta cleavage pathway enzymes annotated in the <i>C. testosteroni</i> and <i>Paenibacillus</i> sp. JJ-1b genomes. .... | 18 |

|                                                                                                                                                                                           |    |
|-------------------------------------------------------------------------------------------------------------------------------------------------------------------------------------------|----|
| Supplementary Table 8   Protein sequence identity of 4,5-meta cleavage pathway enzymes annotated in the <i>C. testosteroni</i> and two previously characterized species.....              | 19 |
| Supplementary Table 9   Sequence similarity between the putative 4-hydroxybenzoate transporter. ....                                                                                      | 20 |
| Supplementary Table 10   Differential gene expression in central carbon metabolism.....                                                                                                   | 20 |
| Supplementary Table 11   Changes in protein abundance for the enzymes in central carbon metabolism. ....                                                                                  | 22 |
| Supplementary Table 12   Free energy calculated from the <sup>13</sup> C-metabolic flux analysis. ....                                                                                    | 24 |
| Supplementary Table 13. Fragmentation analysis of singly labeled citrate and relative intensity (Rel. Int.) of product ions. ....                                                         | 24 |
| Supplementary Table 14   Intracellular metabolic flux rates. ....                                                                                                                         | 25 |
| Supplementary Table 15   <i>In vitro</i> calculation of cofactor specificities for ME, MaeB, IDH2, IDH1, Mdh, and PobA from <i>C. testosteroni</i> KF-1. ....                             | 26 |
| Supplementary Table 16   Protein sequence identity comparison of PobA. ....                                                                                                               | 27 |
| Supplementary Table 17   Quantitative determination of NADH/FADH <sub>2</sub> , NADPH, and ATP production and consumption.....                                                            | 28 |
| Supplementary Table 18   Comparison of transcriptomics, proteomics, and fluxomics. ....                                                                                                   | 28 |
| Supplementary Table 19   The Log <sub>2</sub> fold change in the ratio of substrate (S) to product (P) of quantified intracellular metabolites and <sup>13</sup> C-metabolic fluxes. .... | 30 |
| Supplementary Table 20   Measured allosteric regulation of ME (CtesDRAFT_PD0934) in the presence of five potential effectors. ....                                                        | 31 |
| Supplementary Table 21   Measured allosteric regulation of MaeB (CtesDRAFT_PD5092) in the presence of five potential effectors. ....                                                      | 31 |
| Supplementary Table 22   Nucleotide sequences of synthetic gene fragments encoding the enzymes studied in this work. ....                                                                 | 32 |
| Supplementary Table 23   Nucleotide sequences of primers used for plasmid construction. .                                                                                                 | 35 |
| Supplementary Table 24   Primer sequences used for strain engineering. ....                                                                                                               | 37 |

## SUPPLEMENTARY FIGURES

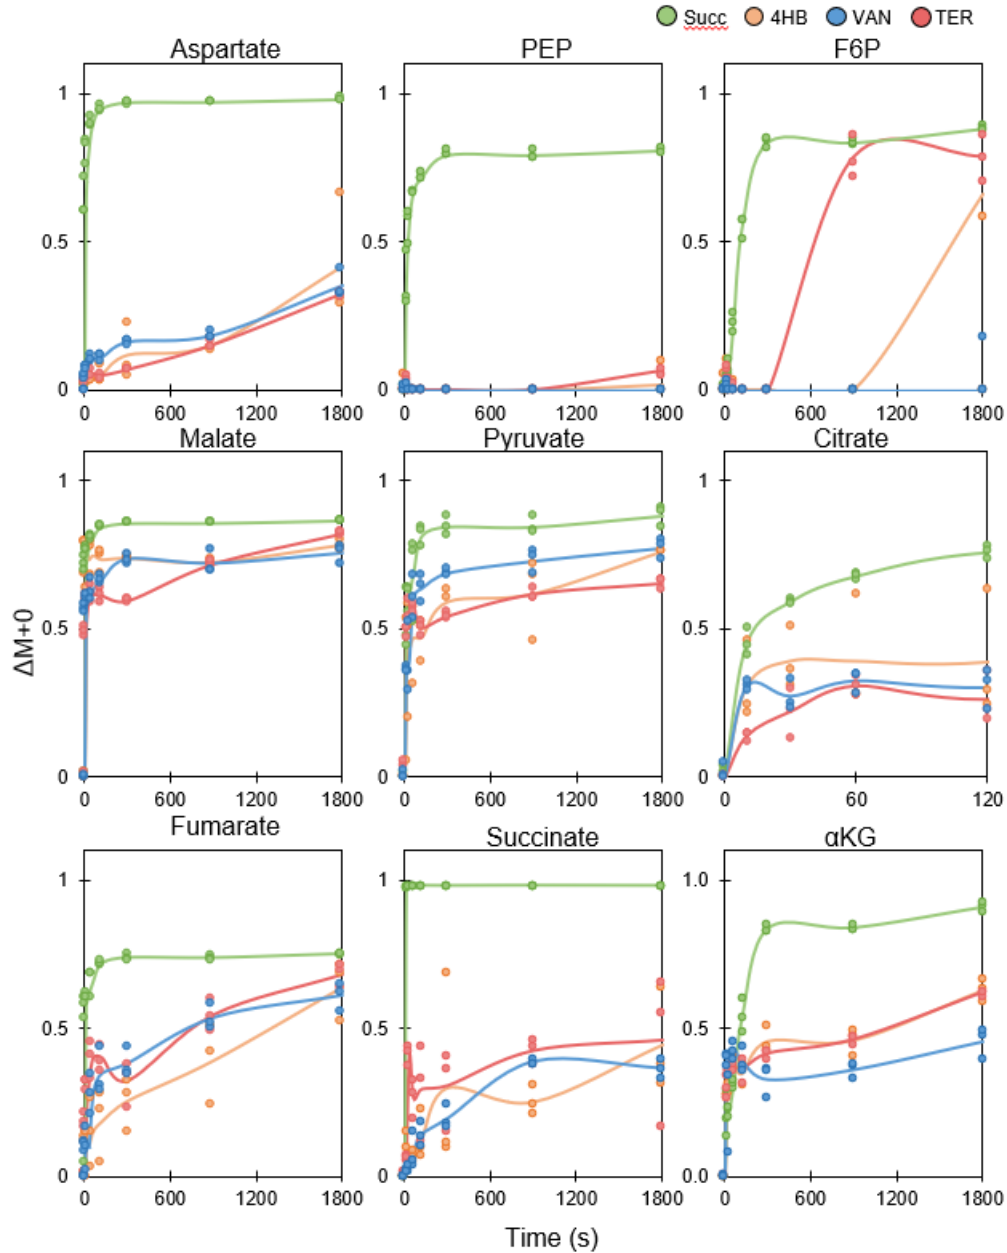

**Supplementary Fig. 1 | Extended data for Fig. 2a.** Experimental kinetic incorporation of nonlabelled fraction ( $M+0$ ) over 1800 s (30 min) after carbon switch from  $^{13}\text{C}$ -succinate to unlabeled succinate (green), 4HB (orange), VAN (blue), or TER (red). Labeling data were from biological replicates ( $n = 3$ ) shown as individual data points. The line through the points denotes the average of the replicates. Metabolite abbreviations: phosphoenolpyruvate, PEP; fructose 6-phosphate, F6P;  $\alpha$ -ketoglutarate,  $\alpha\text{KG}$ .

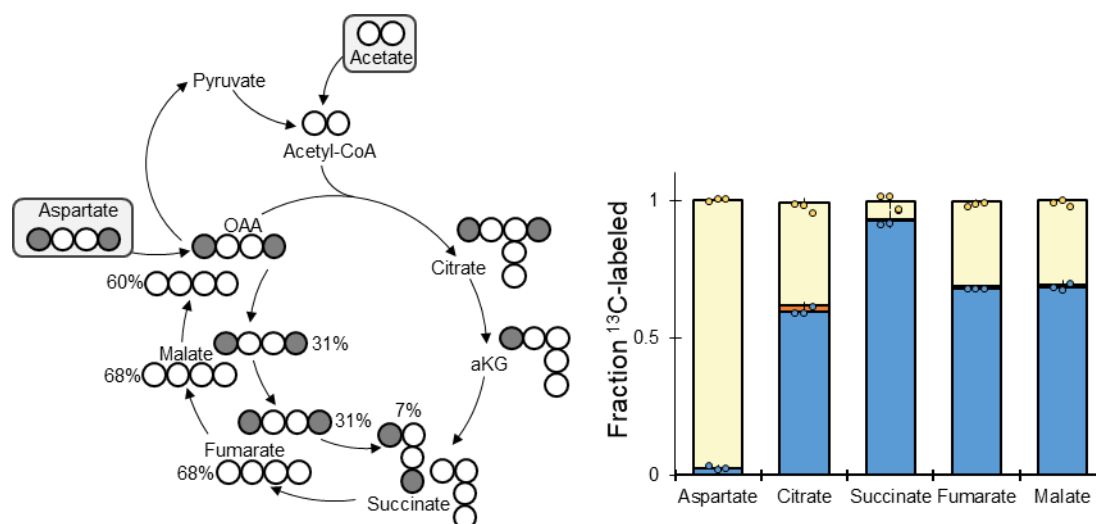

**Supplementary Fig. 2 | Reductive flux from OAA contributes to fumarate pool.** Carbon mapping (left) and experimental data (right) from long-term isotopic enrichment for *C. testosteroni* KF-1 cells grown on [1,4- $^{13}\text{C}_2$ ]-aspartic acid and unlabeled acetate. For the diagram,  $^{13}\text{C}$ -carbons are in grey;  $^{12}\text{C}$ -carbons are in white. Metabolite labeling patterns: M+0 (light blue), M+1 (orange), and M+2 (cream). Labeling data (mean  $\pm$  standard deviation) were from biological replicates ( $n = 3$ ).

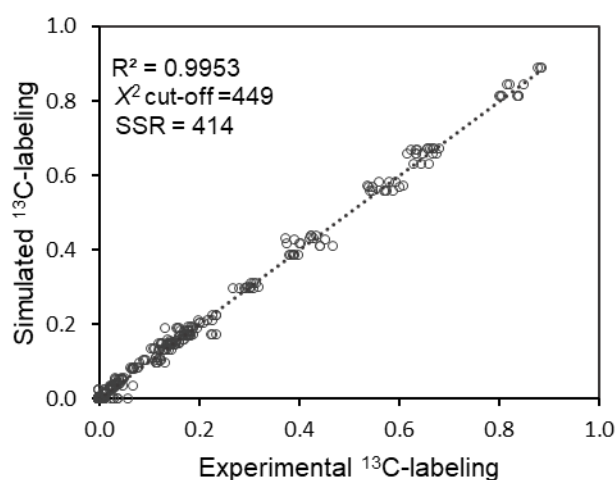

**Supplementary Fig. 3 | Goodness of fit for the  $^{13}\text{C}$ -metabolic flux analysis.** The data show the correlation between the mass isotopomers of the  $^{13}\text{C}$ -labeling experiments and the corresponding model-optimized simulated values. The experimental data for each strain were from two parallel tracer experiments [1- $^{13}\text{C}$ ]- (carboxyl)-4HB and [ $^{13}\text{C}_6$ ]- (phenyl)-4HB. Optimized fluxes are shown in Fig. 6 and Table S10.

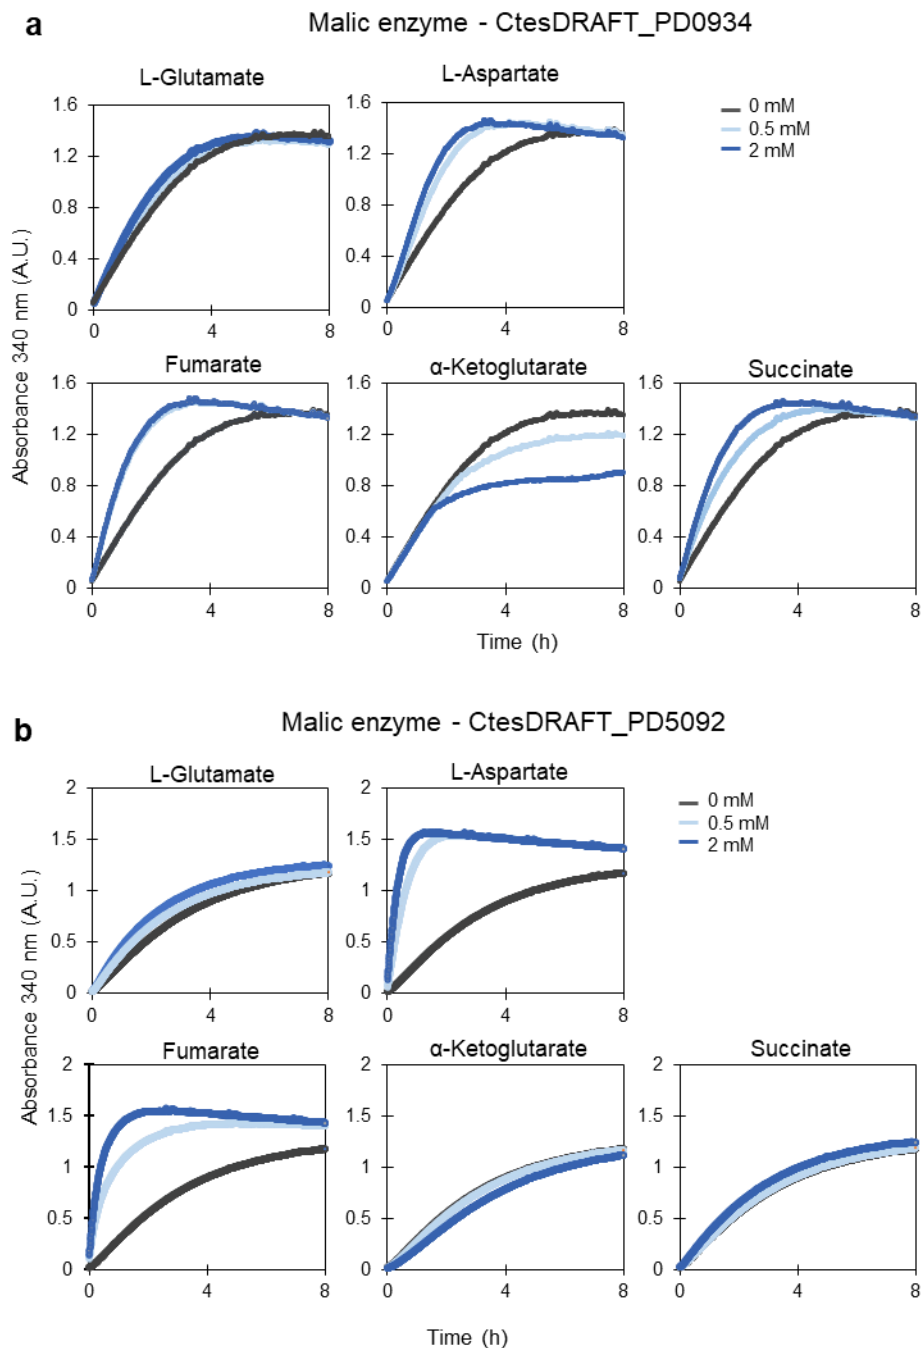

**Supplementary Fig. 4 | Reaction profiles at 340 nm for the two malic enzymes. a) ME (CtesDRAFT\_PD0934) and b) MaeB (CtesDRAFT\_PD5092) in the presence of potential allosteric regulators (effectors): glutamate, aspartate, fumarate,  $\alpha$ -ketoglutarate, or succinate. The control without an effector is shown in black, 0.5 mM of added effector is in light blue, and 2 mM of added effector is in dark blue. Measurements were taken every 20 s. Data points are shown separately for each replicate (n=3)**

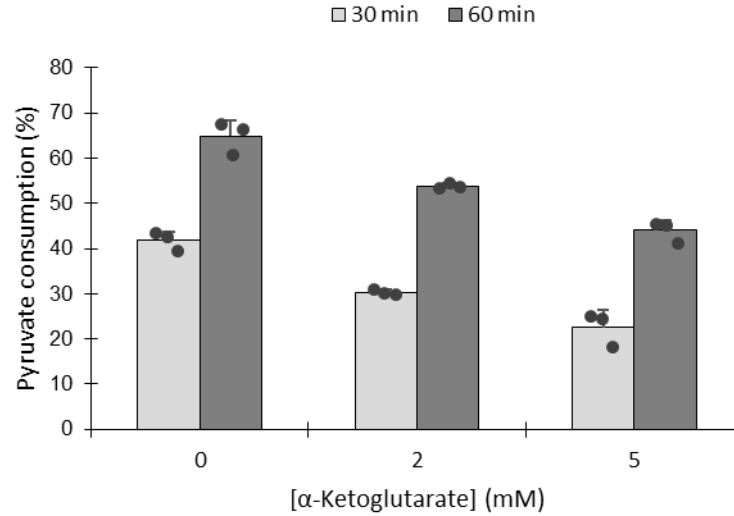

**Supplementary Fig. 5 | Allosteric regulation of PEP synthase.** Percentage of pyruvate consumption after 30 min (light grey) and 60 min (dark grey) for PEP synthase (CtesDRAFT\_PD3828) without or with the addition of α-ketoglutarate. Data are presented as mean ± standard deviation of three biological replicates (n = 3).

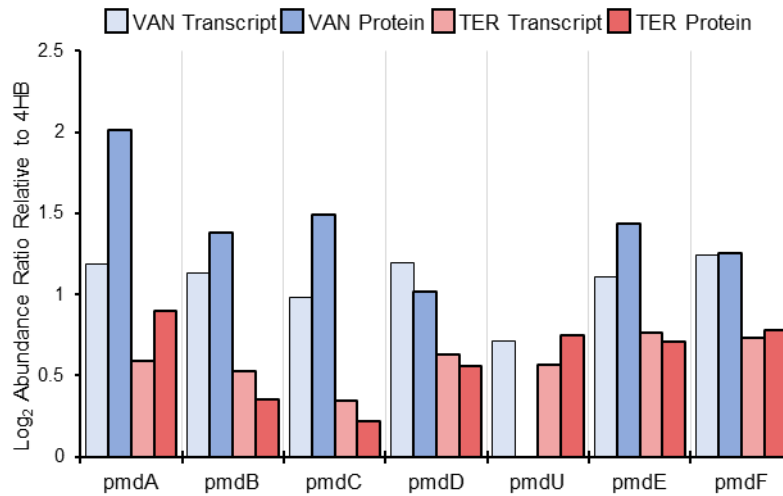

**Supplementary Fig. 6 | Differential gene and protein expression relative to 4HB.** Differences in the 4,5-*meta* cleavage pathway gene expression and protein abundance when cells were grown on VAN (shades of blue) and TER (shades of red) relative to 4HB. Values are expressed as the Log<sub>2</sub> fold changes between growth conditions for triplicate measurements of transcriptomics data and quadruplicate measurements of proteomics data.

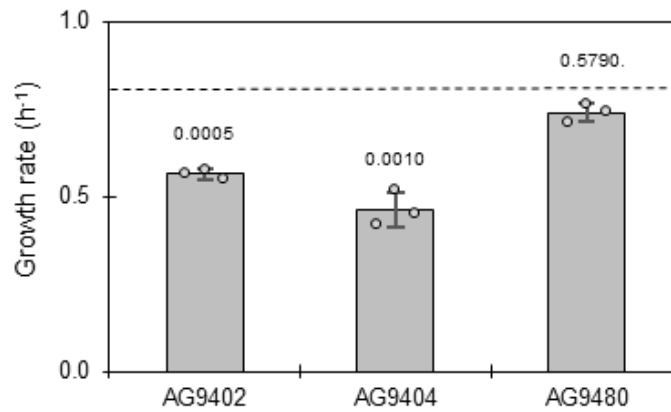

**Supplementary Fig. 7 | Growth rate of the three overexpression strains.** Cells were grown on 100 mM C 4HB. Data are presented as mean  $\pm$  standard deviation of three biological replicates ( $n = 3$ ). Statistically significant differences from the wildtype strain of *C. testosteronei* KF-1 were determined using two-tailed unpaired *t* test.



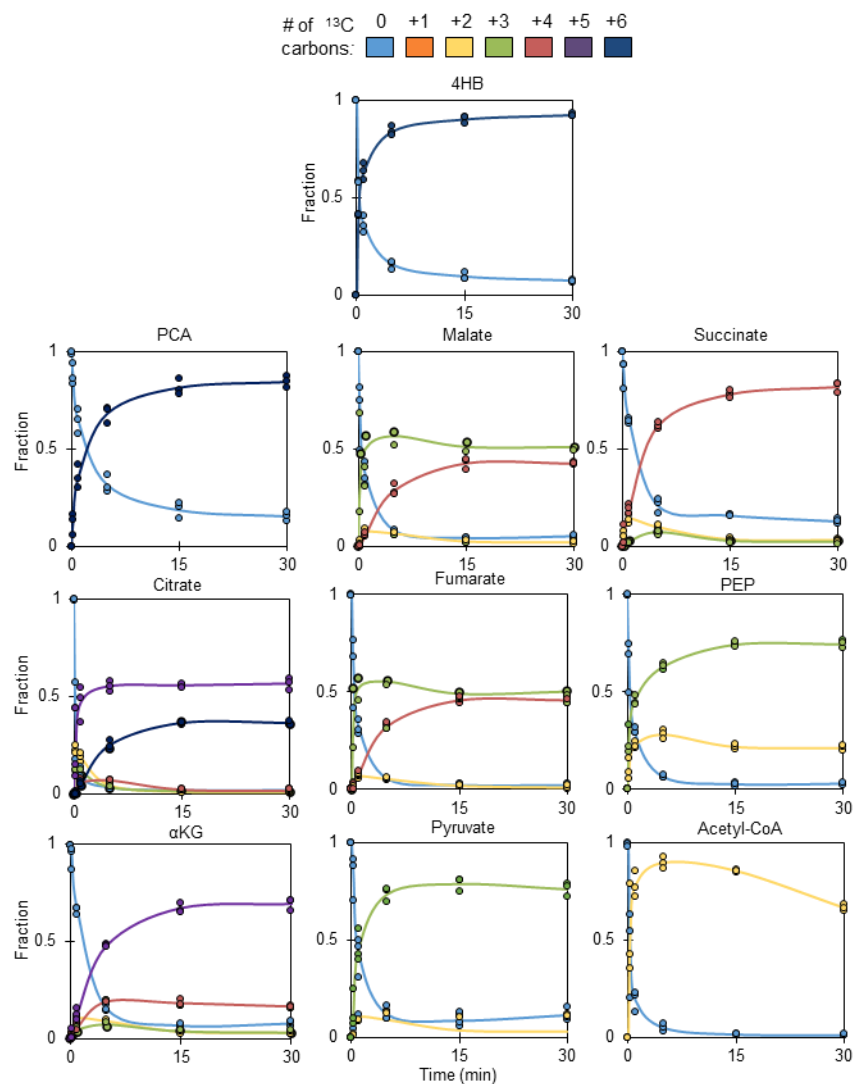

**Supplementary Fig. 8 | Extended data for Fig. 6a.** Kinetics of 4HB assimilation into central carbon metabolism in *C. testosteroni* KF-1 during growth on  $[^{13}\text{C}_6]$ -(phenyl)-4HB over 30 minutes. Labeling data were from biological replicates (n = 3) shown as individual data points. The line through the points denotes the average of the replicates. Abbreviations are as follows: 4-hydroxybenzoate, 4HB; protocatechuate, PCA; phosphoenolpyruvate, PEP;  $\alpha$ -ketoglutarate,  $\alpha\text{KG}$ .

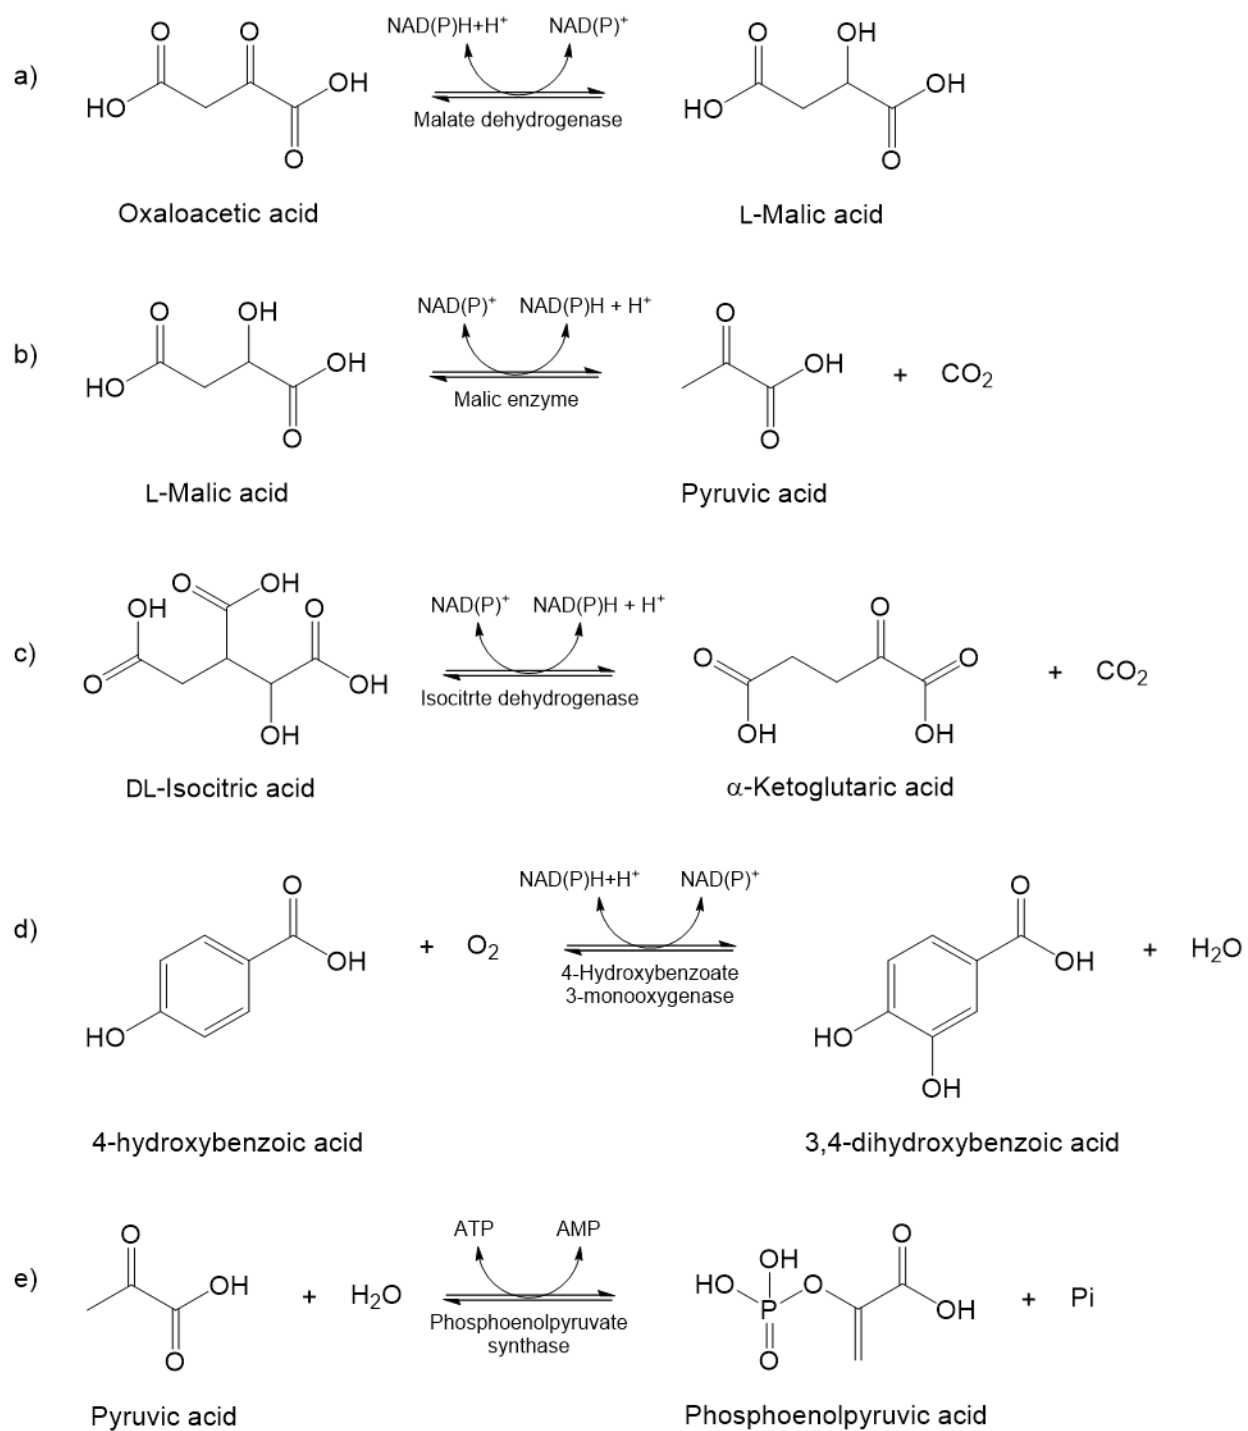

**Supplementary Fig. 9 | Main activities of the selected enzymes from *C. testosteroni*.**

Malate dehydrogenase (a); malic enzyme (b); isocitrate dehydrogenase (c); 4-hydroxybenzoate 3-monooxygenase (d); phosphoenolpyruvate synthase (e).

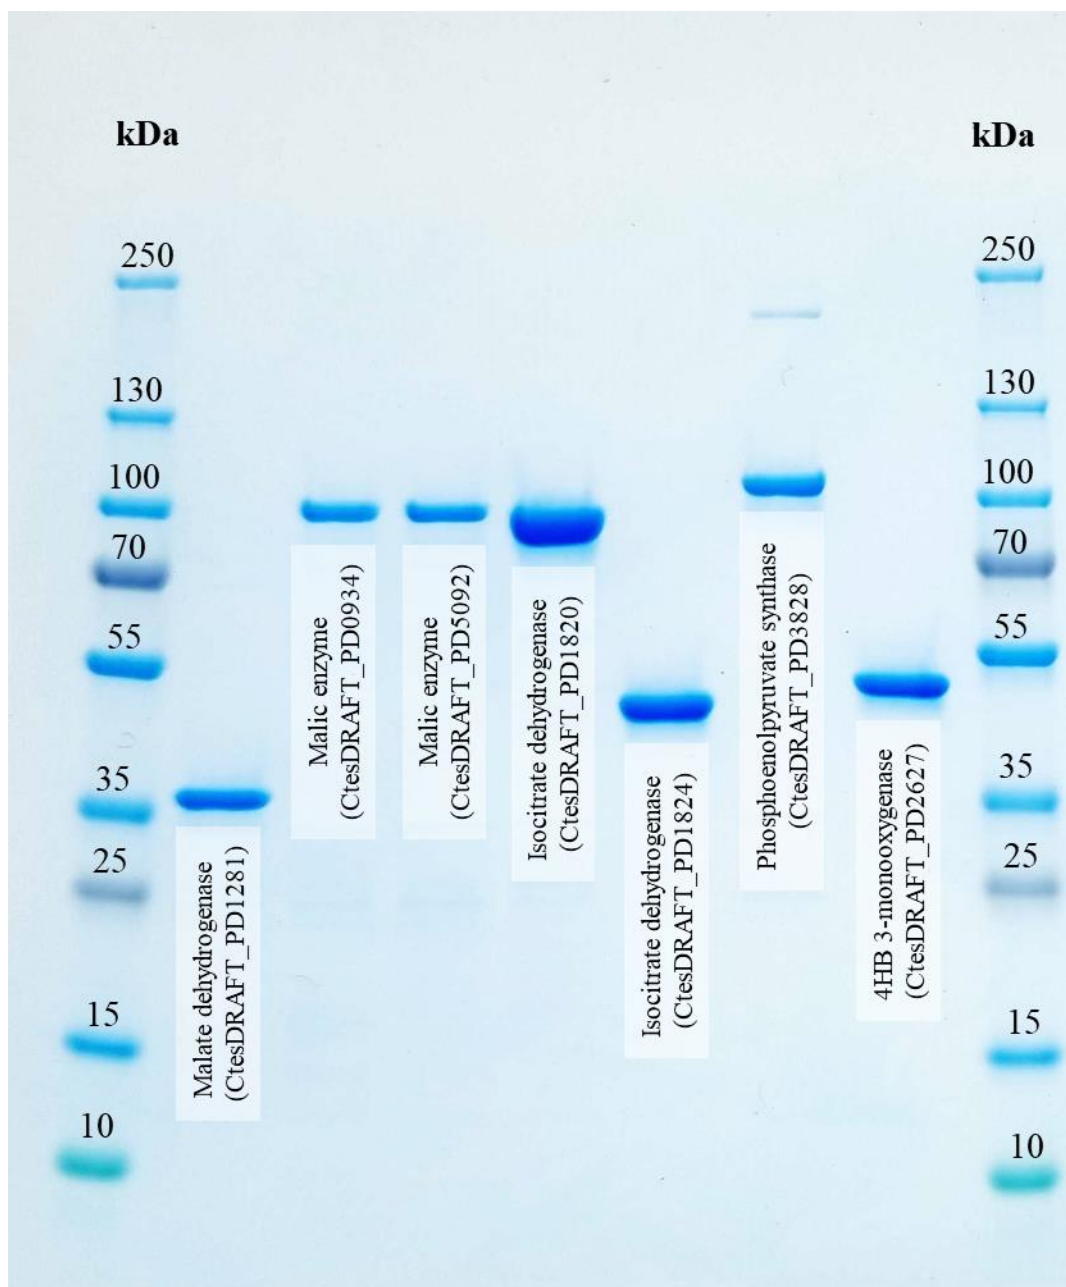

**Supplementary Fig. 10 | Sodium dodecyl sulfate–polyacrylamide gel electrophoresis (SDS–PAGE) of purified proteins.** Proteins were used in experiments to determine cofactor specificities and allosteric regulation.

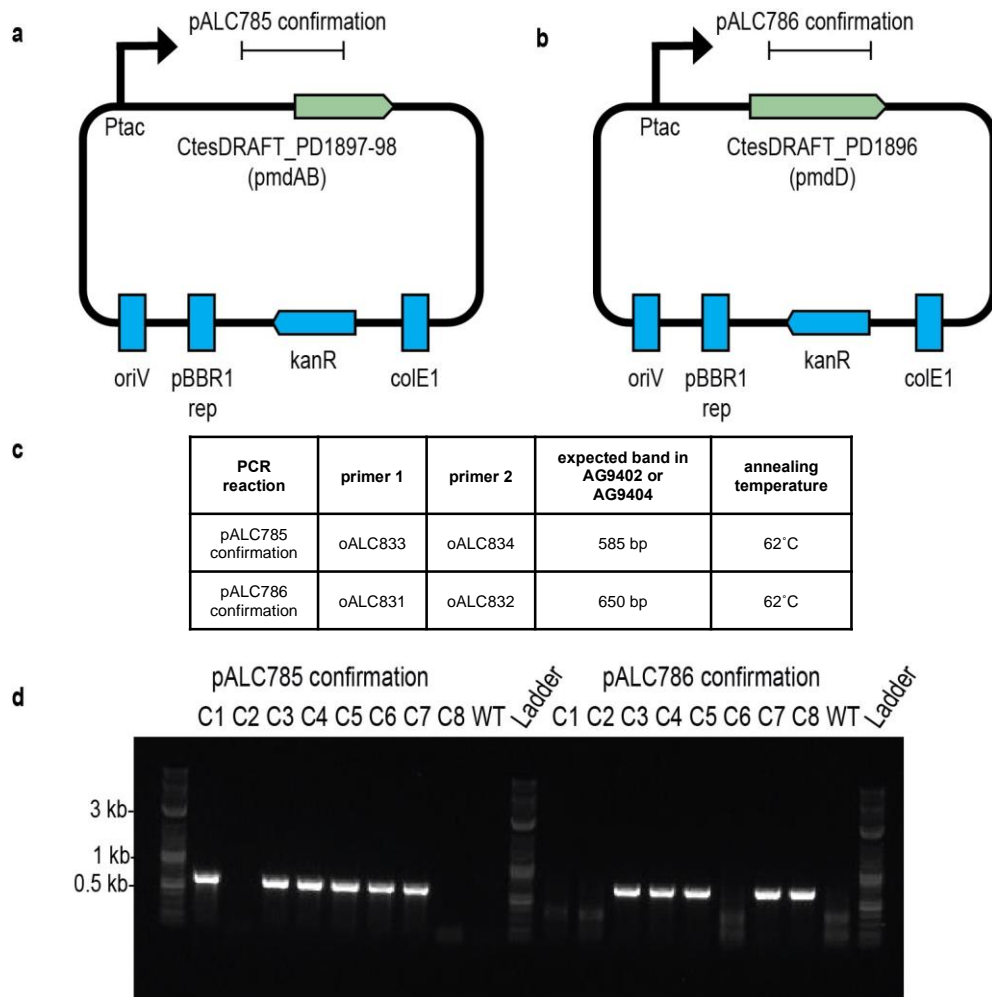

**Supplementary Fig. 11 | Construction of strain AG9402 and AG9404.** Autonomously replicating plasmids (A) pALC785 and (B) pALC786 were transformed into *Comamonas testosteroni* KF-1 to create strains AG9402 and AG9404, respectively. (C) Colony PCR primers and conditions used to verify AG9402 and AG9404 construction. All PCR reactions for strain verification were carried out using Phusion High-Fidelity DNA Polymerase (NEB M0530L). (D) Gel electrophoresis of reactions in (C), including 8 colonies after kanamycin selection, as well as a Wildtype (WT) cell control. Reactions were run on a 1% agarose TAE gel and a 1 kb Plus DNA Ladder (NEB-N3200L) was included for quantifying band sizes. Colony 1 and colony 3 were saved as strains AG9402 and AG9404, respectively.

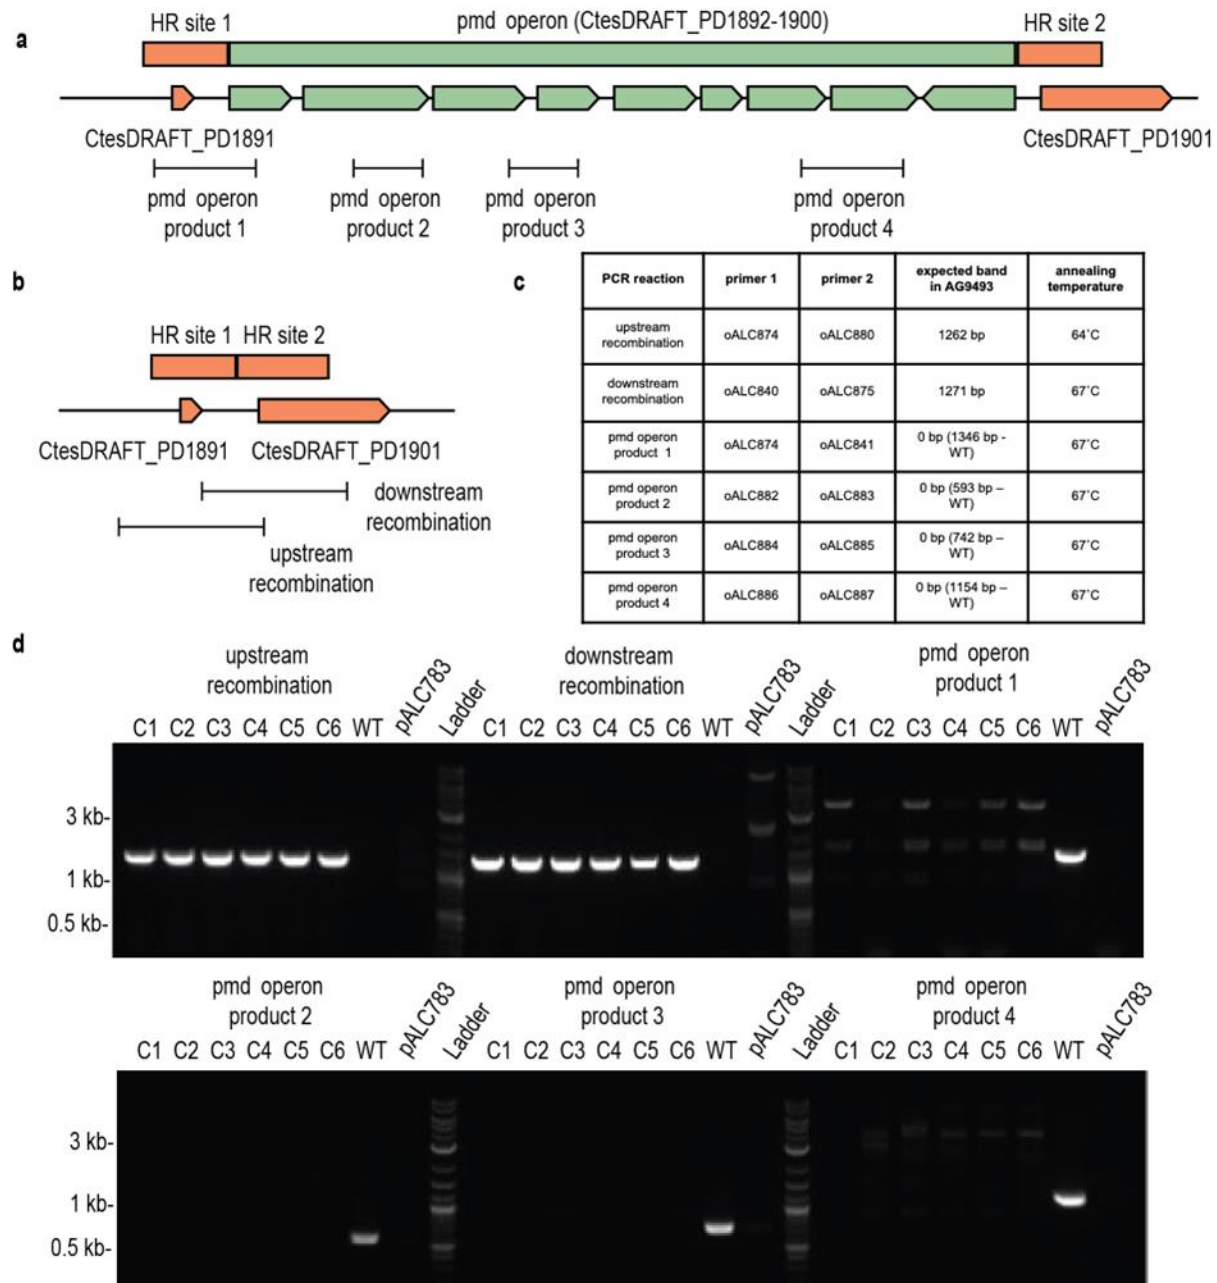

**Supplementary Fig. 12 | Construction of strain AG9493.** The *pmd* operon locus in (A) WT and (B) AG9493 strains, including homologous recombination sites (HR-orange) for pALC783, *pmd* pathway genes (green, not to scale), and amplicons for PCR confirmation. (C) Colony PCR primers and conditions used to verify AG9493 construction. (D) Gel electrophoresis of reactions in (C), including six colonies after sucrose counter selection, as well as a wildtype (WT) cell control and a pALC783 plasmid control. Reactions were run on a 1% agarose TAE gel and a 1 kb Plus DNA Ladder (NEB-N3200L) was included for quantifying band sizes. A wildtype band is not expected in the first two PCR reactions because it would be too large. Colony C1 was saved as strain AG9493.

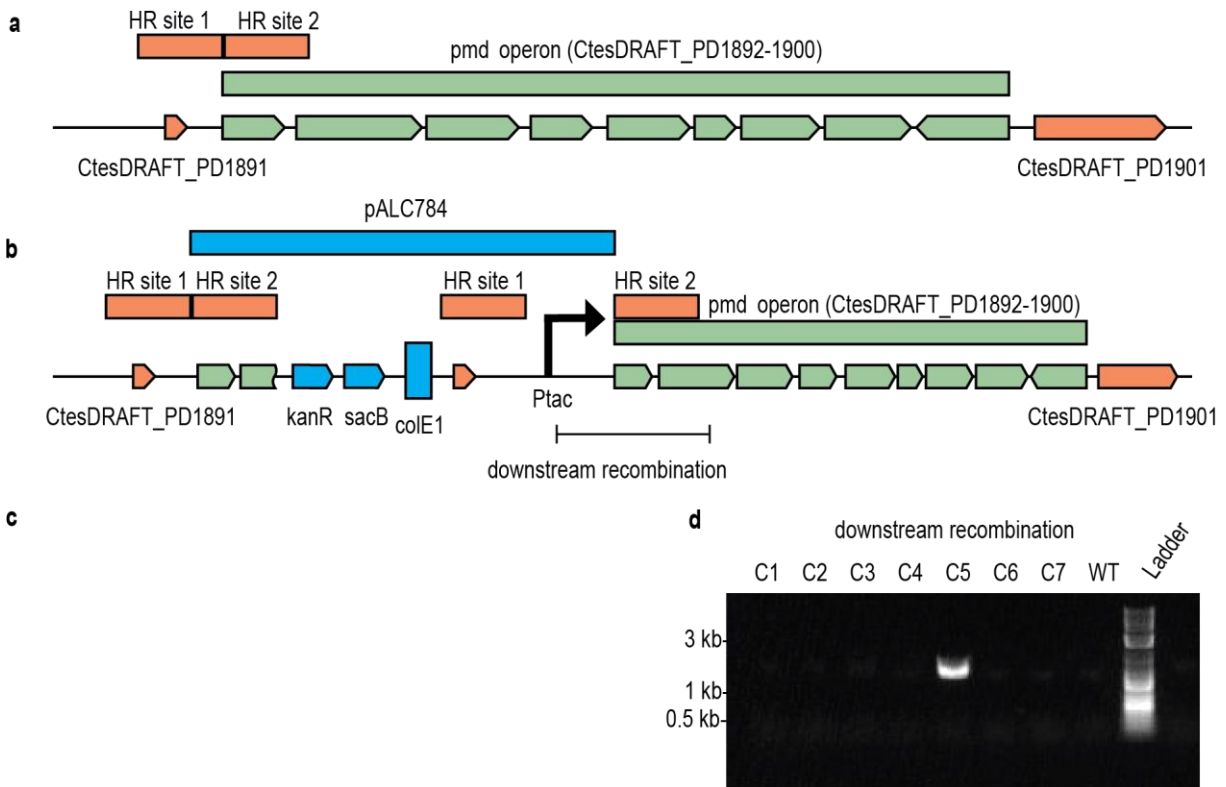

**Supplementary Fig. 13 | Construction of strain AG9480.** The pmc operon locus in (A) WT and (B) AG9480 strains, including homologous recombination sites (HR-orange rectangle) for pALC784, pmc pathway genes (green), a gene upstream of the pmc operon (CtesDRAFT\_PD1891, orange arrow), pBBR1 vector components (blue), and amplicon for PCR confirmation. Strain AG9480 is the product of a single recombination event of pALC784 at HR site 2 in the WT strain. This recombination results in an additional copy of genes CtesDRAFT\_PD1891 and 1892 due to their inclusion in HR sites 1 and 2, as well the insertion of Ptac promoter upstream of the pmc operon. (C) Colony PCR primers and conditions used to verify AG9480 construction. (D) Gel electrophoresis of reaction in (C), including seven colonies after kanamycin selection, as well as a wildtype (WT) cell control. Reactions were run on a 1% agarose TAE gel and a 1 kb Plus DNA Ladder (NEB-N3200L) was included for quantifying band sizes. Colony C5 was saved as strain AG9480.

## SUPPLEMENTARY TABLES

**Supplementary Table 1 | Physiological characteristics.** Data represent mean  $\pm$  standard deviation of *C. testosteroni* KF-1 grown in triplicate on 4-hydroxybenzoate, vanillate, and terephthalate.

|                                                                             | 4-hydroxybenzoate | Vanillate       | Terephthalate   |
|-----------------------------------------------------------------------------|-------------------|-----------------|-----------------|
| Growth rate ( $\text{h}^{-1}$ )                                             | $0.76 \pm 0.03$   | $0.48 \pm 0.04$ | $0.56 \pm 0.03$ |
| Consumption rate ( $\text{mmol g}_{\text{CDW}}^{-1} \text{h}^{-1}$ )        | $11.9 \pm 1.1$    | $5.1 \pm 0.6$   | $5.5 \pm 0.9$   |
| Cumulative secretions ( $\text{mmol C g}_{\text{CDW}}^{-1} \text{h}^{-1}$ ) | $10.9 \pm 1.3$    | $0.04 \pm 0.01$ | $0.25 \pm 0.06$ |

**Supplementary Table 2 | Differential gene expression in initial catabolism pathways to protocatechuate.** Values represent fold changes (FC) in transcript abundance for *C. testosteroni* KF-1 cells grown on aromatic compounds relative to cells grown on succinate. ND, transcript not detected. Statistically significant differential transcript abundance was determined using Degust software package [53, main text]

| Gene Names   | Locus Tag        | Protein                                                     | Transcript abundance $\text{Log}_2(\text{FC})$ |          |                  |          |                  |          |
|--------------|------------------|-------------------------------------------------------------|------------------------------------------------|----------|------------------|----------|------------------|----------|
|              |                  |                                                             | (4HB/SUCC)                                     |          | (VAN/SUCC)       |          | (TER/SUCC)       |          |
|              |                  |                                                             | Average P-values                               |          | Average P-values |          | Average P-values |          |
| <i>pmdK</i>  | CtesDRAFT_PD1893 | 4HB transporter/MFS-transporter/protocatechuate transporter | 5.103                                          | 3.09E-17 | 6.179            | 3.38E-18 | 6.077            | 3.97E-18 |
| <i>pobA</i>  | CtesDRAFT_PD2627 | 4HB 3-monooxygenase                                         | 7.655                                          | 3.84E-14 | 5.082            | 3.98E-12 | 0.536            | 4.15E-02 |
| <i>vanK</i>  | CtesDRAFT_PD0402 | VAN transporter                                             | 1.061                                          | 3.53E-06 | 8.587            | 2.70E-17 | 0.997            | 9.87E-06 |
| <i>vanA1</i> | CtesDRAFT_PD0400 | VAN O-demethylase oxygenase subunit                         | -0.233                                         | 2.82E-03 | 7.458            | 2.34E-20 | 0.662            | 9.58E-08 |
| <i>vanA2</i> | CtesDRAFT_PD0403 | VAN O-demethylase oxidoreductase                            | 0.923                                          | 7.45E-08 | 8.744            | 6.50E-20 | 1.133            | 8.32E-09 |
| <i>vanB</i>  | CtesDRAFT_PD0404 | VAN O-demethylase oxidoreductase                            | 1.333                                          | 7.64E-08 | 8.569            | 1.01E-17 | 0.902            | 1.00E-05 |
| <i>tphC</i>  | CtesDRAFT_PD2131 | TER permease                                                | 0.203                                          | 6.71E-02 | 1.136            | 3.46E-08 | 10.265           | 8.80E-20 |
| <i>tctA</i>  | CtesDRAFT_PD4157 | TER transporter                                             | -3.022                                         | 3.98E-16 | 0.969            | 5.88E-10 | 2.853            | 2.55E-15 |
| <i>tctB</i>  | CtesDRAFT_PD4158 | TER transporter                                             | -3.057                                         | 1.83E-15 | 0.911            | 8.89E-10 | 2.893            | 1.50E-15 |
| <i>tphA2</i> | CtesDRAFT_PD2130 | TER 1,2-dioxygenase oxygenase component large subunit       | ND                                             |          | ND               |          | 9.18             | 1.10E-20 |
| <i>tphA3</i> | CtesDRAFT_PD2129 | TER 1,2-dioxygenase oxygenase component small subunit       | ND                                             |          | ND               |          | 9.762            | 2.67E-19 |

|              |                  |                               |       |          |       |          |       |          |
|--------------|------------------|-------------------------------|-------|----------|-------|----------|-------|----------|
| <i>tphA1</i> | CtesDRAFT_PD2127 | TER 1,2-dioxygenase reductase | ND    |          | ND    |          | 7.29  | 7.39E-18 |
| <i>tphB</i>  | CtesDRAFT_PD2128 | TER dihydrodiol dehydrogenase | 0.229 | 1.23E-02 | 0.709 | 5.45E-07 | 9.391 | 7.66E-21 |

**Supplementary Table 3 | Changes in protein abundance for the enzymes in the initial catabolism pathways to protocatechuate.** Values represent fold changes (FC) in protein abundance for *C. testosteroni* KF-1 cells grown on aromatic compounds relative to cells grown on succinate. Statistically significant differential protein abundance was determined by calculating a Z-score for protein abundance differences, assuming a standard normal distribution, and translating Z-score values to P-values. These P-values were further corrected using the q-value method (controlled to 0.05) to correct for multiple testing familywise error rate. ND, protein not detected. Present, protein found during growth on the aromatic compound but not succinate.

| Gene Names | Locus Tag        | Protein                                                     | Protein abundance Log <sub>2</sub> (FC) |          |            |          |            |          |
|------------|------------------|-------------------------------------------------------------|-----------------------------------------|----------|------------|----------|------------|----------|
|            |                  |                                                             | (4HB/SUCC)                              |          | (VAN/SUCC) |          | (TER/SUCC) |          |
|            |                  |                                                             | Average P-values                        |          | Average    | P-values | Average    | P-values |
| PmdK       | CtesDRAFT_PD1893 | 4HB transporter/MFS-transporter/protocatechuate transporter | Present                                 |          | Present    |          | Present    |          |
| PobA       | CtesDRAFT_PD2627 | 4HB 3-monooxygenase                                         | 6.369                                   | 2.83E-07 | 4.746      | 0.015    | 0.402      | 0.378    |
| VanK       | CtesDRAFT_PD0402 | VAN transporter                                             | ND                                      |          | ND         |          | ND         |          |
| VanA1      | CtesDRAFT_PD0400 | VAN O-demethylase oxygenase subunit                         | ND                                      |          | Present    |          | ND         |          |
| VanA2      | CtesDRAFT_PD0403 | VAN O-demethylase oxidoreductase                            | ND                                      |          | ND         |          | ND         |          |
| VanB       | CtesDRAFT_PD0404 | VAN O-demethylase oxidoreductase                            | ND                                      |          | ND         |          | ND         |          |
| TphC       | CtesDRAFT_PD2131 | TER permease                                                | ND                                      |          | Present    |          | Present    |          |
| TctA       | CtesDRAFT_PD4157 | TER transporter                                             | -1.149                                  | 0.148466 | 0.48       | 0.36     | 2.884      | 0.003    |
| TctB       | CtesDRAFT_PD4158 | TER transporter                                             | ND                                      |          | ND         |          | ND         |          |
| TphA2      | CtesDRAFT_PD2130 | TER 1,2-dioxygenase oxygenase component large subunit       | ND                                      |          | ND         |          | Present    |          |
| TphA3      | CtesDRAFT_PD2129 | TER 1,2-dioxygenase oxygenase component small subunit       | ND                                      |          | ND         |          | Present    |          |
| TphA1      | CtesDRAFT_PD2127 | TER 1,2-dioxygenase reductase                               | ND                                      |          | ND         |          | Present    |          |
| TphB       | CtesDRAFT_PD2128 | TER dihydrodiol dehydrogenase                               | ND                                      |          | ND         |          | Present    |          |



**Supplementary Table 4 | Differential gene expression in the three putative protocatechuate cleavage pathways.** Values represent fold changes (FC) in transcript abundance for *C. testosteroni* KF-1 cells grown on aromatic compounds relative to cells grown on succinate. Grey boxes are for genes that were not found in the *Comamonas testosteroni* KF-1 genome. Statistically significant differential transcript abundance was determined using Degust software package [53, main text].

| Gene Names  | Locus Tag        | Protein                                   | Transcript abundance<br>Log <sub>2</sub> (FC) |          |            |          |            |          |
|-------------|------------------|-------------------------------------------|-----------------------------------------------|----------|------------|----------|------------|----------|
|             |                  |                                           | (4HB/SUCC)                                    |          | (VAN/SUCC) |          | (TER/SUCC) |          |
|             |                  |                                           | Average                                       | P-values | Average    | P-values | Average    | P-values |
| <i>pmdA</i> | CtesDRAFT_PD1897 | PCA 4,5-dioxygenase, alpha subunit        | 4.713                                         | 1.41E-18 | 5.989      | 9.49E-20 | 5.814      | 9.49E-20 |
| <i>pmdB</i> | CtesDRAFT_PD1898 | PCA 4,5-dioxygenase, beta subunit         | 4.733                                         | 9.06E-19 | 5.956      | 7.39E-20 | 5.771      | 7.39E-20 |
| <i>pmdC</i> | CtesDRAFT_PD1899 | CHMS dehydrogenase                        | 4.318                                         | 6.54E-18 | 5.392      | 5.89E-19 | 5.173      | 5.89E-19 |
| <i>pmdD</i> | CtesDRAFT_PD1896 | PDC hydrolase                             | 4.715                                         | 2.66E-18 | 6.004      | 1.88E-19 | 5.856      | 1.88E-19 |
| <i>pmdU</i> | CtesDRAFT_PD1892 | OMA tautomerase                           | 4.696                                         | 4.63E-14 | 5.515      | 6.57E-15 | 5.78       | 6.57E-15 |
| <i>pmdE</i> | CtesDRAFT_PD1894 | OMA hydratase                             | 4.996                                         | 6.86E-19 | 6.195      | 6.67E-20 | 6.268      | 6.67E-20 |
| <i>pmdF</i> | CtesDRAFT_PD1895 | CHA aldolase                              | 4.883                                         | 1.30E-18 | 6.218      | 8.80E-20 | 6.121      | 8.80E-20 |
| <i>pcaH</i> | CtesDRAFT_PD0424 | PCA 3,4-dioxygenase, beta subunit         | -0.043                                        | 7.25E-01 | -0.006     | 9.62E-01 | -0.409     | 9.62E-01 |
| <i>pcaG</i> | NF               | PCA 3,4-dioxygenase alpha subunit         |                                               |          |            |          |            |          |
| <i>pcaB</i> | CtesDRAFT_PD5238 | 3-carboxy-cis,cis-muconate cycloisomerase | 0.04                                          | 8.09E-01 | 0.998      | 1.71E-05 | 0.505      | 1.71E-05 |
| <i>pcaC</i> | CtesDRAFT_PD5237 | CML decarboxylase                         | 0.357                                         | 7.54E-04 | 0.548      | 1.41E-05 | -0.024     | 1.41E-05 |
| <i>pcaD</i> | CtesDRAFT_PD4384 | βKAP enol-lactonase                       | -2.591                                        | 7.38E-09 | 0.307      | 1.18E-02 | 1.886      | 1.18E-02 |
| <i>pcaI</i> | CtesDRAFT_PD5468 | 3-oxoadipyl-CoA-transferase               | -0.231                                        | 1.40E-01 | -0.054     | 7.11E-01 | 0.152      | 7.11E-01 |
| <i>pcaJ</i> | CtesDRAFT_PD1882 | 3-oxoadipyl-CoA-transferase               | -0.107                                        | 4.20E-01 | 0.164      | 2.10E-01 | -0.461     | 2.10E-01 |
| <i>pcaF</i> | CtesDRAFT_PD4382 | 3-oxoadipyl-CoA thiolase                  | -1.838                                        | 8.12E-10 | 0.944      | 2.81E-08 | 2.259      | 2.81E-08 |
| <i>praA</i> | NF               | PCA 2,3-dioxygenase                       |                                               |          |            |          |            |          |
| <i>praH</i> | NF               | 5CHMS decarboxylase                       |                                               |          |            |          |            |          |
| <i>praB</i> | CtesDRAFT_PD5289 | HMS dehydrogenase                         | -0.747                                        | 4.54E-04 | 0.517      | 1.68E-03 | 0.351      | 1.68E-03 |
| <i>praC</i> | CtesDRAFT_PD5334 | OCA tautomerase                           | 0.108                                         | 3.45E-01 | -0.491     | 1.55E-03 | -0.604     | 1.55E-03 |
| <i>praD</i> | CtesDRAFT_PD4982 | OCA decarboxylase                         | -0.049                                        | 5.97E-01 | 0.132      | 1.69E-01 | -0.292     | 1.69E-01 |
| <i>praE</i> | CtesDRAFT_PD3647 | HPD hydratase                             | -0.466                                        | 5.45E-02 | 0.34       | 1.04E-01 | 0.155      | 1.04E-01 |
| <i>praF</i> | CtesDRAFT_PD3649 | HOV aldolase                              | 0.038                                         | 7.84E-01 | 0.352      | 1.86E-02 | 0.258      | 1.86E-02 |

|             |                  |                               |        |              |       |              |       |              |
|-------------|------------------|-------------------------------|--------|--------------|-------|--------------|-------|--------------|
| <i>praG</i> | CtesDRAFT_PD3648 | acetaldehyde<br>dehydrogenase | -0.314 | 1.28E-<br>02 | 0.339 | 4.54E-<br>03 | 0.129 | 4.54E-<br>03 |
|-------------|------------------|-------------------------------|--------|--------------|-------|--------------|-------|--------------|

**Supplementary Table 5 | Changes in protein abundance for the enzymes in the three putative protocatechuate cleavage pathways.** Values represent fold changes (FC) in protein abundance for *C. testosteroni* KF-1 cells grown on aromatic compounds relative to cells grown on succinate. Grey boxes are for genes that were not found in the *Comamonas* genome. Statistically significant differential protein abundance was determined by calculating a Z-score for protein abundance differences, assuming a standard normal distribution, and translating Z-score values to *P*-values. These *P*-values were further corrected using the *q*-value method (controlled to 0.05) to correct for multiple testing familywise error rate. ND, protein not detected. Present, protein found during growth on the aromatic compound but not succinate.

| Gene Names | Locus Tag        | Protein                                   | Protein abundance<br>Log <sub>2</sub> (FC) |          |                  |          |                  |          |
|------------|------------------|-------------------------------------------|--------------------------------------------|----------|------------------|----------|------------------|----------|
|            |                  |                                           | (4HB/SUCC)                                 |          | (VAN/SUCC)       |          | (TER/SUCC)       |          |
|            |                  |                                           | Average P-values                           |          | Average P-values |          | Average P-values |          |
| PmdA       | CtesDRAFT_PD1897 | PCA 4,5-dioxygenase, alpha subunit        | Present                                    |          | Present          |          | Present          |          |
| PmdB       | CtesDRAFT_PD1898 | PCA 4,5-dioxygenase, beta subunit         | 4.685                                      | 1.47E-06 | 6.066            | 3.43E-04 | 5.042            | 3.43E-04 |
| PmdC       | CtesDRAFT_PD1899 | CHMS dehydrogenase                        | 4.281                                      | 5.33E-19 | 5.771            | 4.70E-09 | 4.502            | 4.70E-09 |
| PmdD       | CtesDRAFT_PD1896 | PDC hydrolase                             | 4.202                                      | 9.5E-27  | 5.221            | 2.99E-18 | 4.759            | 2.99E-18 |
| PmdU       | CtesDRAFT_PD1892 | OMA tautomerase                           | Present                                    |          | Present          |          | Present          |          |
| PmdE       | CtesDRAFT_PD1894 | OMA hydratase                             | 4.47                                       | 7.75E-17 | 5.91             | 3.62E-14 | 5.183            | 3.62E-14 |
| PmdF       | CtesDRAFT_PD1895 | CHA aldolase                              | Present                                    |          | Present          |          | Present          |          |
| PcaH       | CtesDRAFT_PD0424 | PCA 3,4-dioxygenase, beta subunit         | ND                                         |          | ND               |          | ND               |          |
| PcaG       | NF               | PCA 3,4-dioxygenase alpha subunit         |                                            |          |                  |          |                  |          |
| PcaB       | CtesDRAFT_PD5238 | 3-carboxy-cis,cis-muconate cycloisomerase | ND                                         |          | ND               |          | ND               |          |
| PcaC       | CtesDRAFT_PD5237 | CML decarboxylase                         | ND                                         |          | ND               |          | ND               |          |
| PcaD       | CtesDRAFT_PD4384 | βKAP enol-lactonase                       | ND                                         |          | ND               |          | ND               |          |
| PcaI       | CtesDRAFT_PD5468 | 3-oxoadipyl-CoA-transferase               | ND                                         |          | ND               |          | ND               |          |
| PcaJ       | CtesDRAFT_PD1882 | 3-oxoadipyl-CoA-transferase               | ND                                         |          | ND               |          | ND               |          |
| PcaF       | CtesDRAFT_PD4382 | 3-oxoadipyl-CoA thiolase                  | ND                                         |          | ND               |          | ND               |          |
| PraA       | NF               | PCA 2,3-dioxygenase                       |                                            |          |                  |          |                  |          |
| PraH       | NF               | 5CHMS decarboxylase                       |                                            |          |                  |          |                  |          |
| PraB       | CtesDRAFT_PD5289 | HMS dehydrogenase                         | ND                                         |          | ND               |          | ND               |          |
| PraC       | CtesDRAFT_PD5334 | OCA tautomerase                           | ND                                         |          | ND               |          | ND               |          |
| PraD       | CtesDRAFT_PD4982 | OCA decarboxylase                         | ND                                         |          | ND               |          | ND               |          |
| PraE       | CtesDRAFT_PD3647 | HPD hydratase                             | ND                                         |          | ND               |          | ND               |          |
| PraF       | CtesDRAFT_PD3649 | HOV aldolase                              | ND                                         |          | ND               |          | ND               |          |

|      |                  |                               |    |    |    |
|------|------------------|-------------------------------|----|----|----|
| PraG | CtesDRAFT_PD3648 | acetaldehyde<br>dehydrogenase | ND | ND | ND |
|------|------------------|-------------------------------|----|----|----|

**Supplementary Table 6 | Protein sequence identity of ortho cleavage pathway enzymes annotated in the *C. testosteroni* and *P. putida* genomes.** Abbreviations for metabolites are described in Fig. 1 of the main text. NF, not found; NA, not applicable.

| <i>C. testosteroni</i> Kf-1 | Comparison organism |                                           |                         |              |                       |
|-----------------------------|---------------------|-------------------------------------------|-------------------------|--------------|-----------------------|
| Tag                         | Names               | Function                                  | Organism                | Identity (%) | UniProt Accession No. |
| CtesDRAFT_PD0424            | PcaH                | PCA 3,4-dioxygenase, beta subunit         | <i>P. putida</i> KT2440 | 30.4%        | Q88E12                |
| NF                          | PcaG                | PCA 3,4-dioxygenase alpha subunit         | <i>P. putida</i> KT2440 | NA           | Q88E13                |
| CtesDRAFT_PD5238            | PcaB                | 3-carboxy-cis,cis-muconate cycloisomerase | <i>P. putida</i> KT2440 | 38.6%        | Q88N37                |
| CtesDRAFT_PD5237            | PcaC                | CML decarboxylase                         | <i>P. putida</i> KT2440 | 43.2%        | Q88N35                |
| CtesDRAFT_PD4384            | PcaD                | $\beta$ KAP enol-lactonase                | <i>P. putida</i> KT2440 | 49.6%        | Q88N36                |
| CtesDRAFT_PD5468            | PcaI                | 3-oxoadipyl-CoA-transferase               | <i>P. putida</i> KT2440 | 66.4%        | Q88FX5                |
| CtesDRAFT_PD1882            | PcaJ                | 3-oxoadipyl-CoA-transferase               | <i>P. putida</i> KT2440 | 58.0%        | P0A101                |
| CtesDRAFT_PD4382            | PcaF                | 3-oxoadipyl-CoA thiolase                  | <i>P. putida</i> KT2440 | 68.3%        | Q88N39                |

**Supplementary Table 7 | Protein sequence identity of 2,3-meta cleavage pathway enzymes annotated in the *C. testosteroni* and *Paenibacillus* sp. JJ-1b genomes.** Abbreviations for metabolites are described in Fig. 1 of the main text. NF, not found; NA, not applicable.

| <i>C. testosteroni</i> Kf-1 | Comparison organism |                     |                                |              |                       |
|-----------------------------|---------------------|---------------------|--------------------------------|--------------|-----------------------|
| Tag                         | Names               | Function            | Organism                       | Identity (%) | UniProt Accession No. |
| NF                          | PraA                | PCA 2,3-dioxygenase | <i>Paenibacillus</i> sp. JJ-1b | NA           | C4TP01                |
| NF                          | PraH                | 5CHMS decarboxylase | <i>Paenibacillus</i> sp. JJ-1b | NA           | C4TP08                |
| CtesDRAFT_PD5289            | PraB                | HMS dehydrogenase   | <i>Paenibacillus</i> sp. JJ-1b | 41.2%        | C4TP02                |

|                  |      |                            |                                |       |        |
|------------------|------|----------------------------|--------------------------------|-------|--------|
| CtesDRAFT_PD5334 | PraC | OCA tautomerase            | <i>Paenibacillus</i> sp. JJ-1b | 29.5% | C4TP07 |
| CtesDRAFT_PD4982 | PraD | OCA decarboxylase          | <i>Paenibacillus</i> sp. JJ-1b | 23.3% | C4TP06 |
| CtesDRAFT_PD3647 | PraE | HPD hydratase              | <i>Paenibacillus</i> sp. JJ-1b | 46.3% | C4TP03 |
| CtesDRAFT_PD3649 | PraF | HOV aldolase               | <i>Paenibacillus</i> sp. JJ-1b | 57.6% | C4TP05 |
| CtesDRAFT_PD3648 | PraG | acetaldehyde dehydrogenase | <i>Paenibacillus</i> sp. JJ-1b | 56.7% | C4TP04 |

**Supplementary Table 8 | Protein sequence identity of 4,5-meta cleavage pathway enzymes annotated in the *C. testosteroni* and two previously characterized species.** Abbreviations for metabolites are described in Fig. 1 of main text.

| <i>C. testosteroni</i> Kf-1 | Comparison organisms |                                    |                              |                           |                       |
|-----------------------------|----------------------|------------------------------------|------------------------------|---------------------------|-----------------------|
| Tag                         | Names                | Function                           | Organism                     | Identity (%)              | UniProt Accession No. |
| CtesDRAFT_PD1897            | PmdA                 | PCA 4,5-dioxygenase, alpha subunit | <i>Comamonas</i> sp. E6      | 96.7%                     | Q8RNY0                |
|                             | LigA                 | PCA 4,5-dioxygenase alpha chain    | <i>Sphingobium</i> sp. SYK-6 | 65.0%                     | P22635                |
| CtesDRAFT_PD1898            | PmdB                 | PCA 4,5-dioxygenase, beta subunit  | <i>Comamonas</i> sp. E6      | 99.7%                     | D1MWA0                |
|                             | LigB                 | PCA 4,5-dioxygenase, beta chain    | <i>Sphingobium</i> sp. SYK-6 | 60.5%                     | P22636                |
| CtesDRAFT_PD1899            | PmdC                 | CHMS dehydrogenase                 | <i>Comamonas</i> sp. E6      | 99.1%                     | D1MWA1                |
|                             | LigC                 | CHMS dehydrogenase                 | <i>Sphingobium</i> sp. SYK-6 | 76.6%                     | Q9KWL3                |
| CtesDRAFT_PD1896            | PmdD                 | PDC hydrolase                      | <i>Comamonas</i> sp. E6      | 98.0%                     | D1MW98                |
|                             | LigI                 | PDC hydrolase                      | <i>Sphingobium</i> sp. SYK-6 | 54.6%                     | O87170                |
| CtesDRAFT_PD1892            | PmdU                 | OMA tautomerase                    | <i>Comamonas</i> sp. E6      | 95.7%                     | D1MW94                |
|                             | LigU                 | OMA isomerase                      | <i>Sphingobium</i> sp. SYK-6 | No significant similarity | Q0KJL4                |
| CtesDRAFT_PD1894            | PmdE                 | OMA hydratase                      | <i>Comamonas</i> sp. E6      | 100.0%                    | D1MW96                |
|                             | LigJ                 | OMA hydratase                      | <i>Sphingobium</i> sp. SYK-6 | 63.50%                    | G2IQQ5                |

|                  |      |              |                              |        |        |
|------------------|------|--------------|------------------------------|--------|--------|
| CtesDRAFT_PD1895 | PmdF | CHA aldolase | <i>Comamonas</i> sp. E6      | 98.7%  | D1MW97 |
|                  | LigK | CHA aldolase | <i>Sphingobium</i> sp. SYK-6 | 65.90% | G2IQQ8 |

**Supplementary Table 9 | Sequence similarity between the putative 4-hydroxybenzoate transporter.**

| <i>C. testosteroni</i> Kf-1 | Comparison organisms |                               |                                  |              |                       |
|-----------------------------|----------------------|-------------------------------|----------------------------------|--------------|-----------------------|
| Tag                         | Names                | Function                      | Organism                         | Identity (%) | UniProt Accession No. |
| CtesDRAFT_PD1893            | PmdK                 | 4-hydroxybenzoate transporter | <i>Comamonas</i> sp. E6          | 98.5%        | D1MW95                |
|                             | PcaK                 | 4-hydroxybenzoate transporter | <i>Pseudomonas putida</i> KT2440 | 49.1%        | Q88N40                |

**Supplementary Table 10 | Differential gene expression in central carbon metabolism.**

Values represent fold changes (FC) in transcript abundance for *C. testosteroni* KF-1 cells grown on aromatic compounds relative to cells grown on succinate. Statistically significant differential transcript abundance was determined using Degust software package [53, main text].

| Gene Names<br>or identifier | Locus Tag        | Protein                           | Transcript abundance<br>Log <sub>2</sub> (FC) |          |                  |          |                  |          |
|-----------------------------|------------------|-----------------------------------|-----------------------------------------------|----------|------------------|----------|------------------|----------|
|                             |                  |                                   | (4HB/SUCC)                                    |          | (VAN/SUCC)       |          | (TER/SUCC)       |          |
|                             |                  |                                   | Average P-values                              |          | Average P-values |          | Average P-values |          |
| PDH                         | CtesDRAFT_PD2531 | Pyruvate dehydrogenase            | 0.681                                         | 3.70E-07 | 0.351            | 2.31E-04 | 0.443            | 2.62E-05 |
| GltA                        | CtesDRAFT_PD1274 | Citrate synthase                  | 0.426                                         | 1.76E-07 | 0.119            | 0.011    | 0.589            | 4.35E-09 |
| AcnB                        | CtesDRAFT_PD1285 | Aconitate hydratase B (aconitase) | 0.430                                         | 2.37E-06 | 1.026            | 1.46E-10 | 0.245            | 4.48E-04 |
| AcnA                        | CtesDRAFT_PD1305 | Aconitate hydratase B (aconitase) | 0.424                                         | 3.14E-04 | 0.537            | 3.81E-05 | 0.052            | 0.546    |
| IDH1                        | CtesDRAFT_PD1820 | Isocitrate dehydrogenase [NADP]   | 0.380                                         | 2.77E-05 | 0.295            | 2.72E-04 | 0.866            | 4.19E-09 |
| IDH2                        | CtesDRAFT_PD1824 | Isocitrate dehydrogenase [NADP]   | -0.410                                        | 4.23E-05 | -0.090           | 0.196    | 0.526            | 3.71E-06 |
| Suc1                        | CtesDRAFT_PD2650 | 2-oxoglutarate dehydrogenase      | 0.215                                         | 0.004    | 0.707            | 6.01E-08 | 0.739            | 3.42E-08 |
| Suc2                        | CtesDRAFT_PD2649 | 2-oxoglutarate dehydrogenase      | 0.204                                         | 0.004    | 0.546            | 6.80E-07 | 0.669            | 7.10E-08 |
| SucA                        | CtesDRAFT_PD2651 | 2-oxoglutarate dehydrogenase      | 0.229                                         | 0.013    | 0.625            | 4.16E-06 | 0.721            | 8.87E-07 |
| SucD                        | CtesDRAFT_PD5114 | Succinyl-coenzymeA synthase       | -0.361                                        | 1.71E-04 | -1.034           | 2.39E-09 | 0.122            | 0.096    |
| SucC                        | CtesDRAFT_PD5113 | Succinyl-coenzymeA synthase       | -0.374                                        | 6.21E-05 | -1.120           | 3.76E-10 | 0.084            | 0.207    |

|      |                  |                                                           |        |          |        |          |        |          |
|------|------------------|-----------------------------------------------------------|--------|----------|--------|----------|--------|----------|
| SdhB | CtesDRAFT_PD1276 | Succinate dehydrogenase                                   | 0.225  | 1.79E-04 | 0.051  | 0.253    | 0.426  | 3.09E-07 |
| SdhA | CtesDRAFT_PD1279 | Succinate dehydrogenase                                   | 0.180  | 0.006    | -0.011 | 0.837    | 0.417  | 5.33E-06 |
| SdhC | CtesDRAFT_PD1277 | Succinate dehydrogenase                                   | 0.240  | 1.29E-04 | -0.021 | 0.629    | 0.406  | 6.86E-07 |
| SdhD | CtesDRAFT_PD1278 | Succinate dehydrogenase                                   | 0.212  | 0.001    | 0.052  | 0.272    | 0.387  | 1.90E-06 |
| FumC | CtesDRAFT_PD3618 | Fumarate hydratase                                        | 0.399  | 9.53E-05 | 0.004  | 0.960    | -0.453 | 4.34E-05 |
| FH2  | CtesDRAFT_PD3620 | Fumarate hydratase                                        | 0.078  | 0.410    | -0.505 | 1.17E-04 | 0.696  | 6.43E-06 |
| Mdh  | CtesDRAFT_PD1281 | Malate dehydrogenase                                      | 0.547  | 4.47E-07 | 0.064  | 0.271    | 0.918  | 1.32E-09 |
| Mqo  | CtesDRAFT_PD1015 | malate:quinone oxidoreductase                             | -2.444 | 3.80E-15 | -5.632 | 2.81E-17 | -5.378 | 5.63E-17 |
| AceA | CtesDRAFT_PD1530 | Isocitrate lyase                                          | -0.110 | 0.378    | 0.253  | 0.049    | 0.441  | 0.003    |
| MS   | CtesDRAFT_PD5335 | Malate synthase                                           | 0.578  | 0.002    | -0.748 | 2.28E-04 | -0.462 | 0.008    |
| PycB | CtesDRAFT_PD0191 | Pyruvate carboxylase                                      | 0.029  | 0.724    | 0.617  | 2.93E-06 | 0.104  | 0.232    |
| Pck  | CtesDRAFT_PD5031 | PEP carboxykinase                                         | -1.315 | 5.07E-10 | 0.531  | 1.58E-05 | -0.130 | 0.111    |
| Ppc  | CtesDRAFT_PD1089 | PEP carboxylase                                           | -0.413 | 2.60E-06 | -0.517 | 2.40E-07 | -0.110 | 0.047    |
| ME   | CtesDRAFT_PD0934 | Malic enzyme                                              | -0.209 | 0.001    | -0.625 | 2.33E-08 | -0.151 | 0.010    |
| MaeB | CtesDRAFT_PD5092 | Malic enzyme                                              | -1.206 | 1.76E-11 | -0.280 | 1.59E-04 | -0.360 | 1.42E-05 |
| PEPs | CtesDRAFT_PD3828 | Phosphoenolpyruvate synthase                              | -0.445 | 1.33E-04 | -0.082 | 0.335    | 0.772  | 6.94E-07 |
| PK   | CtesDRAFT_PD5271 | Pyruvate kinase                                           | 0.271  | 2.27E-05 | -0.395 | 4.94E-07 | 0.269  | 2.49E-05 |
| Eno  | CtesDRAFT_PD3884 | Enolase                                                   | -0.233 | 0.014    | -0.355 | 0.001    | 0.485  | 6.71E-05 |
| Gpm  | CtesDRAFT_PD0700 | 2,3-bisphosphoglycerate-dependent phosphoglycerate mutase | -0.185 | 0.014    | -0.790 | 3.25E-08 | -0.054 | 0.422    |
| Pgk  | CtesDRAFT_PD5167 | Phosphoglycerate kinase                                   | -0.645 | 4.46E-06 | -0.329 | 0.002    | -0.121 | 0.169    |
| Gap  | CtesDRAFT_PD5265 | Glyceraldehyde-3-phosphate dehydrogenase                  | -0.451 | 5.70E-05 | -0.030 | 0.697    | 0.617  | 3.02E-06 |
| TpiA | CtesDRAFT_PD3953 | Triosephosphate isomerase                                 | -0.206 | 0.027    | -0.375 | 0.001    | 0.183  | 0.045    |
| Fba  | CtesDRAFT_PD5277 | Fructose-1,6-bisphosphate aldolase                        | -0.549 | 4.17E-07 | 0.023  | 0.692    | 0.215  | 0.002    |
| Fbp  | CtesDRAFT_PD1620 | Fructose-1,6-bisphosphatase                               | -0.086 | 0.203    | -0.321 | 2.78E-04 | -0.002 | 0.978    |
| Pgi1 | CtesDRAFT_PD0867 | Glucose-6-phosphate isomerase                             | -0.113 | 0.227    | 0.538  | 2.62E-05 | -0.155 | 0.126    |
| Rpe  | CtesDRAFT_PD5427 | Ribulose-phosphate 3-epimerase                            | 0.050  | 0.278    | -0.110 | 0.030    | -0.028 | 0.541    |
| RpiA | CtesDRAFT_PD2537 | Ribose-5-phosphate isomerase A                            | 0.030  | 0.624    | -0.301 | 2.89E-04 | 0.111  | 0.087    |

|      |                  |                                       |        |       |        |          |        |       |
|------|------------------|---------------------------------------|--------|-------|--------|----------|--------|-------|
| Tkt  | CtesDRAFT_PD5266 | transketolase                         | -0.191 | 0.003 | -0.464 | 1.02E-06 | 0.099  | 0.079 |
| Tal  | CtesDRAFT_PD0868 | Transaldolase                         | -0.263 | 0.381 | 0.463  | 0.102    | -0.097 | 0.750 |
| PntA | CtesDRAFT_PD4838 | NAD(P) transhydrogenase subunit alpha | -0.142 | 0.029 | 0.169  | 0.005    | 0.091  | 0.091 |
| PntB | CtesDRAFT_PD4837 | NAD(P) transhydrogenase subunit beta  | -0.207 | 0.012 | 0.223  | 0.006    | 0.183  | 0.021 |

**Supplementary Table 11 | Changes in protein abundance for the enzymes in central carbon metabolism.** Values represent fold changes (FC) in protein abundance for *C. testosteroni* KF-1 cells grown on aromatic compounds relative to cells grown on succinate. Statistically significant differential protein abundance was determined by calculating a Z-score for protein abundance differences, assuming a standard normal distribution, and translating Z-score values to *P*-values. These *P*-values were further corrected using the *q*-value method (controlled to 0.05) to correct for multiple testing familywise error rate. ND, protein not detected.

| Gene Names<br>or identifier | Locus Tag        | Protein                              | Protein abundance<br>Log <sub>2</sub> (FC) |       |                  |       |                  |       |
|-----------------------------|------------------|--------------------------------------|--------------------------------------------|-------|------------------|-------|------------------|-------|
|                             |                  |                                      | (4HB/SUCC)                                 |       | (VAN/SUCC)       |       | (TER/SUCC)       |       |
|                             |                  |                                      | Average P-values                           |       | Average P-values |       | Average P-values |       |
| PDH                         | CtesDRAFT_PD2531 | Pyruvate dehydrogenase               | 0.174                                      | 0.286 | -0.224           | 0.371 | 0.024            | 0.397 |
| GltA                        | CtesDRAFT_PD1274 | Citrate synthase                     | 0.456                                      | 0.229 | 0.405            | 0.320 | 0.270            | 0.336 |
| AcnB                        | CtesDRAFT_PD1285 | Aconitate hydratase B<br>(aconitase) | 0.221                                      | 0.177 | -0.189           | 0.370 | 0.419            | 0.027 |
| AcnA                        | CtesDRAFT_PD1305 | Aconitate hydratase B<br>(aconitase) | 1.205                                      | 0.000 | 0.819            | 0.351 | 0.361            | 0.162 |
| IDH1                        | CtesDRAFT_PD1820 | Isocitrate dehydrogenase<br>[NADP]   | 0.463                                      | 0.139 | 0.573            | 0.229 | 0.523            | 0.094 |
| IDH2                        | CtesDRAFT_PD1824 | Isocitrate dehydrogenase<br>[NADP]   | -0.223                                     | 0.333 | ND               |       | 0.416            | 0.275 |
| Suc1                        | CtesDRAFT_PD2650 | 2-oxoglutarate<br>dehydrogenase      | 0.158                                      | 0.314 | 0.574            | 0.272 | 0.402            | 0.124 |
| Suc2                        | CtesDRAFT_PD2649 | 2-oxoglutarate<br>dehydrogenase      | 0.309                                      | 0.206 | 0.963            | 0.064 | 0.179            | 0.335 |
| SucA                        | CtesDRAFT_PD2651 | 2-oxoglutarate<br>dehydrogenase      | 0.182                                      | 0.347 | 0.911            | 0.097 | 0.259            | 0.304 |
| SucD                        | CtesDRAFT_PD5114 | Succinyl-coenzymeA<br>synthase       | 0.066                                      | 0.391 | -0.326           | 0.372 | 0.115            | 0.377 |
| SucC                        | CtesDRAFT_PD5113 | Succinyl-coenzymeA<br>synthase       | 0.024                                      | 0.397 | -1.268           | 0.018 | 0.052            | 0.393 |
| SdhB                        | CtesDRAFT_PD1276 | Succinate dehydrogenase              | 0.155                                      | 0.387 | -1.720           | 0.160 | -0.068           | 0.397 |
| SdhA                        | CtesDRAFT_PD1279 | Succinate dehydrogenase              | 0.277                                      | 0.368 | ND               |       | 0.082            | 0.397 |
| SdhC                        | CtesDRAFT_PD1277 | Succinate dehydrogenase              | 0.133                                      | 0.374 | -0.514           | 0.260 | -0.100           | 0.384 |
| SdhD                        | CtesDRAFT_PD1278 | Succinate dehydrogenase              | -0.081                                     | 0.387 | ND               |       | ND               |       |

|      |                  |                                                                  |        |       |        |       |        |       |
|------|------------------|------------------------------------------------------------------|--------|-------|--------|-------|--------|-------|
| FumC | CtesDRAFT_PD3618 | Fumarate hydratase                                               | 1.374  | 0.027 | 0.469  | 0.264 | 0.011  | 0.399 |
| FH2  | CtesDRAFT_PD3620 | Fumarate hydratase                                               | -0.111 | 0.383 | -0.419 | 0.384 | 0.032  | 0.398 |
| Mdh  | CtesDRAFT_PD1281 | Malate dehydrogenase                                             | 0.645  | 0.054 | 0.319  | 0.366 | 0.489  | 0.188 |
| Mqo  | CtesDRAFT_PD1015 | malate:quinone<br>oxidoreductase                                 | ND     |       | ND     |       | ND     |       |
| AceA | CtesDRAFT_PD1530 | Isocitrate lyase                                                 | ND     |       | ND     |       | ND     |       |
| MS   | CtesDRAFT_PD5335 | Malate synthase                                                  | 0.832  | 0.210 | 0.286  | 0.384 | 0.016  | 0.399 |
| PycB | CtesDRAFT_PD0191 | Pyruvate carboxylase                                             | ND     |       | ND     |       | ND     |       |
| Pck  | CtesDRAFT_PD5031 | PEP carboxykinase                                                | -1.299 | 0.005 | 1.123  | 0.174 | -0.519 | 0.160 |
| Ppc  | CtesDRAFT_PD1089 | PEP carboxylase                                                  | 0.222  | 0.308 | ND     |       | -0.100 | 0.379 |
| ME   | CtesDRAFT_PD0934 | Malic enzyme                                                     | -0.050 | 0.397 | -0.161 | 0.393 | -0.343 | 0.315 |
| MaeB | CtesDRAFT_PD5092 | Malic enzyme                                                     | ND     |       | -0.106 | 0.397 | -0.135 | 0.391 |
| PEPs | CtesDRAFT_PD3828 | PEP synthase                                                     | -0.630 | 0.024 | -0.536 | 0.179 | 0.016  | 0.398 |
| PK   | CtesDRAFT_PD5271 | Pyruvate kinase                                                  | 0.341  | 0.183 | 0.223  | 0.305 | 0.351  | 0.267 |
| Eno  | CtesDRAFT_PD3884 | Enolase                                                          | -0.146 | 0.379 | -0.049 | 0.398 | 0.333  | 0.274 |
| Gpm  | CtesDRAFT_PD0700 | 2,3-bisphosphoglycerate-<br>dependent<br>phosphoglycerate mutase | -0.304 | 0.346 | -0.479 | 0.272 | -0.160 | 0.386 |
| Pgk  | CtesDRAFT_PD5167 | Phosphoglycerate kinase                                          | -0.595 | 0.197 | 0.120  | 0.385 | -0.360 | 0.315 |
| Gap  | CtesDRAFT_PD5265 | Glyceraldehyde-3-<br>phosphate dehydrogenase                     | -0.452 | 0.169 | -0.861 | 0.215 | 0.109  | 0.383 |
| TpiA | CtesDRAFT_PD3953 | Triosephosphate<br>isomerase                                     | -0.332 | 0.281 | 0.443  | 0.338 | -0.162 | 0.374 |
| Fba  | CtesDRAFT_PD5277 | Fructose-1,6-bisphosphate<br>aldolase                            | -0.398 | 0.107 | -0.603 | 0.145 | -0.176 | 0.316 |
| Fbp  | CtesDRAFT_PD1620 | Fructose-1,6-<br>bisphosphatase                                  | 0.077  | 0.386 | -0.357 | 0.192 | -0.072 | 0.394 |
| Pgi1 | CtesDRAFT_PD0867 | Glucose-6-phosphate<br>isomerase                                 | ND     |       | ND     |       | ND     |       |
| Rpe  | CtesDRAFT_PD5427 | Ribulose-phosphate 3-<br>epimerase                               | ND     |       | ND     |       | ND     |       |
| RpiA | CtesDRAFT_PD2537 | Ribose-5-phosphate<br>isomerase A                                | -0.025 | 0.398 | -0.199 | 0.335 | -1.158 | 0.186 |
| Tkt  | CtesDRAFT_PD5266 | transketolase                                                    | -0.133 | 0.388 | 0.105  | 0.395 | -0.099 | 0.393 |



|      |                  |                                       |       |       |       |       |        |       |
|------|------------------|---------------------------------------|-------|-------|-------|-------|--------|-------|
| Tal  | CtesDRAFT_PD0868 | Transaldolase                         | 0.252 | 0.387 | 0.806 | 0.283 | -0.263 | 0.388 |
| PntA | CtesDRAFT_PD4838 | NAD(P) transhydrogenase subunit alpha | ND    |       | ND    |       | ND     |       |
| PntB | CtesDRAFT_PD4837 | NAD(P) transhydrogenase subunit beta  | ND    |       | ND    |       | ND     |       |

**Supplementary Table 12 | Free energy calculated from the  $^{13}\text{C}$ -metabolic flux analysis.** The 95% confidence intervals of the  $\Delta G$  are reported for the lower bound (L.B) and upper bound (U.B.)

| Reaction                         | Flux ratio | $\Delta G = -RT \ln(J^+/J^-)$ |             |             |
|----------------------------------|------------|-------------------------------|-------------|-------------|
| <i>Forward flux direction</i>    | $J^+/J^-$  | $\Delta G$<br>(kJ/mol)        | <i>L.B.</i> | <i>U.B.</i> |
| Succinate $\rightarrow$ Fumarate | 1.03       | -0.078                        | 0           | -0.029      |
| Fumarate $\rightarrow$ Malate    | 1.00       | -0.010                        | -0.046      | -0.0056     |
| Malate $\rightarrow$ OAA         | 1.04       | -0.10                         | -0.10       | -0.099      |
| Malate $\rightarrow$ Pyruvate    | 4.63       | -3.95                         | -5.67       | 0.10        |

**Supplementary Table 13. Fragmentation analysis of singly labeled citrate and relative intensity (Rel. Int.) of product ions.**

| Carbon origin      | M+1 Citrate (192.0219 m/z) |                 |           |                 |
|--------------------|----------------------------|-----------------|-----------|-----------------|
|                    | m+0                        |                 | m+1       |                 |
|                    | m/z found                  | Rel. int.       | m/z found | Rel. int.       |
| [3,2,1,5]          | 85.02757                   | 0.32 $\pm$ 0.06 | 86.03116  | 0.68 $\pm$ 0.06 |
| [3,2,1] or [1,2,5] | 87.00713                   | 0.31 $\pm$ 0.01 | 88.01083  | 0.69 $\pm$ 0.01 |

**Supplementary Table 14 | Intracellular metabolic flux rates.** Rates were determined from parallel quantitative flux modeling of *C. testosteroni* KF-1 during growth on [1-<sup>13</sup>C]-(carboxyl)-4HB and [<sup>13</sup>C<sub>6</sub>]- (phenyl)-4HB. For reversible reactions, the net flux is in the direction shown. Cellular secretions are designated as EX and biomass efflux is designated as B. Error is shown as lower bound (LB) and upper bound (UB) 95% confidence intervals and standard deviation (SD) for three biological replicates (n=3). Refer to the legend of Fig. 2 for metabolite names.

| Uptake rate (mmol/g <sub>cdw</sub> /h):11.6 ± 3.4 |                                  |          | Uptake (%) |          |      |
|---------------------------------------------------|----------------------------------|----------|------------|----------|------|
| Rxn                                               | Flux                             | Best fit | LB (95%)   | UB (95%) | SD   |
| v1                                                | 4HB_EX = 4HB                     | 100.0    | 98.3       | 101.4    | 0.8  |
| v2                                                | 4HB = PCA                        | 100.0    | 98.3       | 101.4    | 0.8  |
| v3                                                | PCA = PDC                        | 95.7     | 93.9       | 97.3     | 0.9  |
| v4                                                | PDC = PYR + OAA                  | 91.4     | 88.6       | 94.0     | 1.4  |
| v5                                                | SUCC = FUM                       | 79.8     | 75.1       | 85.1     | 2.5  |
| v6                                                | FUM = 0.5 MAL + 0.5 MAL          | 79.8     | 75.1       | 85.1     | 2.5  |
| v7                                                | MAL = OAA                        | 9.5      | 2.8        | 14.8     | 3.0  |
| v8                                                | ACCOA + OAA = CIT                | 88.7     | 83.8       | 94.4     | 2.6  |
| v9                                                | CIT = AKG + CO2                  | 85.4     | 78.3       | 93.9     | 3.9  |
| v10                                               | AKG = 0.5 SUCC + 0.5 SUCC + CO2  | 76.4     | 69.3       | 84.7     | 3.9  |
| v11                                               | CIT = 0.5 SUCC + 0.5 SUCC + GLOX | 3.4      | 0.0        | 7.9      | 2.0  |
| v12                                               | GLOX + ACCOA = MAL               | 3.4      | 0.0        | 7.9      | 2.0  |
| v13                                               | OAA = PEP + CO2                  | 5.7      | 4.4        | 9.2      | 1.2  |
| v14                                               | PEP + CO2 = OAA                  | 0.0      | 0.0        | 5.1      | 1.3  |
| v15                                               | OAA = PYR + CO2                  | 0.0      | 0.0        | 3.5      | 0.9  |
| v16                                               | PYR + CO2 = OAA                  | 0.0      | 0.0        | 5.6      | 1.4  |
| v17                                               | MAL = PYR + CO2                  | 73.3     | 67.0       | 80.2     | 3.3  |
| v18                                               | PYR = ACCOA + CO2                | 129.3    | 120.2      | 138.7    | 4.6  |
| v19                                               | PYR = PEP                        | 17.4     | 13.8       | 30.4     | 4.2  |
| v20                                               | PEP = PYR                        | 0.0      | 0.0        | 15.5     | 3.9  |
| v21                                               | PEP = 3PG                        | 17.6     | 13.6       | 21.6     | 2.0  |
| v22                                               | 3PG = GAP                        | 11.1     | 8.2        | 14.0     | 1.4  |
| v23                                               | GAP = DHAP                       | 4.6      | 1.2        | 3.4      | 0.6  |
| v24                                               | DHAP + GAP = FBP                 | 3.9      | 2.9        | 5.0      | 0.5  |
| v25                                               | FBP = F6P                        | 3.9      | 2.9        | 5.0      | 0.5  |
| v26                                               | F6P = G6P                        | 1.4      | 0.8        | 2.1      | 0.3  |
| v27                                               | S7P + GAP = E4P + F6P            | 0.1      | -0.4       | 0.5      | 0.2  |
| v28                                               | R5P + Xu5P = S7P + GAP           | 0.1      | -0.4       | 0.5      | 0.2  |
| v29                                               | E4P + Xu5P = F6P + GAP           | -2.6     | -3.4       | -2.0     | 0.3  |
| v30                                               | Xu5P = R5P                       | 2.5      | 1.7        | 3.4      | 0.4  |
| v31                                               | CO2 = CO2_EX                     | 370.2    | 351.5      | 515.4    | 41.0 |
| v32                                               | CO2_EX = CO2                     | 0.0      | 0.0        | 2.5      | 0.6  |
| v33                                               | AKG = AKG_EX                     | 4.0      | 2.9        | 5.0      | 0.5  |
| v34                                               | PCA = PCA_EX                     | 4.3      | 3.5        | 5.0      | 0.4  |
| v35                                               | PDC = PDC_EX                     | 4.3      | 2.3        | 6.2      | 1.0  |
| v36                                               | MAL = MAL_EX                     | 0.2      | 0.1        | 0.3      | 0.1  |
| v37                                               | PYR = PYR_EX                     | 5.5      | 4.0        | 7.2      | 0.8  |
| v38                                               | 3PG = B_3PG                      | 6.5      | 3.7        | 9.3      | 1.4  |
| v39                                               | AKG = B_AKG                      | 5.0      | 2.9        | 7.0      | 1.0  |
| v40                                               | DHAP = B_DHAP                    | 0.6      | 0.4        | 0.9      | 0.1  |

|     |                 |      |      |      |     |
|-----|-----------------|------|------|------|-----|
| v41 | E4P = B_E4P     | 2.7  | 1.9  | 3.6  | 0.4 |
| v42 | G6P = B_G6P     | 1.4  | 0.8  | 2.1  | 0.3 |
| v43 | OAA = B_OAA     | 6.6  | 3.7  | 9.5  | 1.5 |
| v44 | PEP = B_PEP     | 5.5  | 3.1  | 7.4  | 1.1 |
| v45 | PYR = B_PYR     | 12.6 | 7.9  | 17.2 | 2.3 |
| v46 | R5P = B_R5P     | 2.4  | 1.4  | 3.7  | 0.6 |
| v47 | ACCOA = B_ACCOA | 37.3 | 29.6 | 43.8 | 3.6 |

**Supplementary Table 15 | *In vitro* calculation of cofactor specificities for ME, MaeB, IDH2, IDH1, Mdh, and PobA from *C. testosteroni* KF-1.** Specific activities ( $\text{mmol min}^{-1} \text{g}^{-1}$ ) are reported for each replicate (listed as 1, 2, and 3) as well as the relative activity toward a cofactor as a percentage of the total measured activity.

| MALIC ENZYME - CtesDRAFT_PD0933 (ME)                          |       |       |       |       |       |
|---------------------------------------------------------------|-------|-------|-------|-------|-------|
|                                                               | 1     | 2     | 3     | Avg   | SD    |
| NADP <sup>+</sup><br>( $\text{mmol min}^{-1} \text{g}^{-1}$ ) | 0.81  | 0.81  | 0.83  | 0.82  | 0.01  |
| NAD <sup>+</sup><br>( $\text{mmol min}^{-1} \text{g}^{-1}$ )  | 0     | 0     | 0     | 0     | 0     |
| NADP <sup>+</sup> (%)                                         | 100   | 100   | 100   | 100   | 0     |
| NAD <sup>+</sup> (%)                                          | 0     | 0     | 0     | 0     | 0     |
| MALIC ENZYME - CtesDRAFT_PD5092 (MaeB)                        |       |       |       |       |       |
|                                                               | 1     | 2     | 3     | Avg   | SD    |
| NADP <sup>+</sup><br>( $\text{mmol min}^{-1} \text{g}^{-1}$ ) | 0.016 | 0.016 | 0.015 | 0.016 | 0.001 |
| NAD <sup>+</sup><br>( $\text{mmol min}^{-1} \text{g}^{-1}$ )  | 0.099 | 0.096 | 0.100 | 0.098 | 0.002 |
| NADP <sup>+</sup> (%)                                         | 14.1  | 14.3  | 12.8  | 13.7  | 0.8   |
| NAD <sup>+</sup> (%)                                          | 85.9  | 85.7  | 87.2  | 86.3  | 0.8   |
| ISOCITRATE DEHYDROGENASE - CtesDRAFT_PD1824 (IDH2)            |       |       |       |       |       |
|                                                               | 1     | 2     | 3     | Avg   | SD    |
| NADP <sup>+</sup><br>( $\text{mmol min}^{-1} \text{g}^{-1}$ ) | 12.12 | 11.50 | 13.35 | 12.32 | 0.94  |
| NAD <sup>+</sup><br>( $\text{mmol min}^{-1} \text{g}^{-1}$ )  | 0.11  | 0.10  | 0.11  | 0.10  | 0.00  |
| NADP <sup>+</sup> (%)                                         | 99.1  | 99.1  | 99.2  | 99.2  | 0.0   |
| NAD <sup>+</sup> (%)                                          | 0.9   | 0.9   | 0.8   | 0.8   | 0.0   |
| ISOCITRATE DEHYDROGENASE - CtesDRAFT_PD1820 (IDH1)            |       |       |       |       |       |
|                                                               | 1     | 2     | 3     | Avg   | SD    |

|                                                                |        |        |        |        |      |
|----------------------------------------------------------------|--------|--------|--------|--------|------|
| NADP <sup>+</sup><br>(mmol min <sup>-1</sup> g <sup>-1</sup> ) | 61.55  | 60.39  | 61.69  | 61.21  | 0.71 |
| NAD <sup>+</sup><br>(mmol min <sup>-1</sup> g <sup>-1</sup> )  | 0.00   | 0.00   | 0.00   | 0.00   | 0.00 |
| NADP <sup>+</sup> (%)                                          | 100    | 100    | 100    | 100    | 0    |
| NAD <sup>+</sup> (%)                                           | 0.0    | 0.0    | 0.0    | 0.0    | 0.0  |
| MALATE DEHYDROGENASE - CtesDRAFT_PD1281 (Mdh)                  |        |        |        |        |      |
|                                                                | 1      | 2      | 3      | Avg    | SD   |
| NADP <sup>+</sup><br>(mmol min <sup>-1</sup> g <sup>-1</sup> ) | 30.66  | 30.82  | 31.26  | 30.91  | 0.31 |
| NAD <sup>+</sup><br>(mmol min <sup>-1</sup> g <sup>-1</sup> )  | 319.47 | 319.47 | 319.47 | 319.47 | 0.00 |
| NADP <sup>+</sup> (%)                                          | 8.8    | 8.8    | 8.9    | 8.8    | 0.1  |
| NAD <sup>+</sup> (%)                                           | 91.2   | 91.2   | 91.1   | 91.2   | 0.1  |
| 4HB 3-MONOOXYGENASE - CtesDRAFT_PD2627 (PobA)                  |        |        |        |        |      |
|                                                                | 1      | 2      | 3      | Avg    | SD   |
| NADP <sup>+</sup><br>(mmol min <sup>-1</sup> g <sup>-1</sup> ) | 1.64   | 1.65   | 1.78   | 1.69   | 0.08 |
| NAD <sup>+</sup><br>(mmol min <sup>-1</sup> g <sup>-1</sup> )  | 0.00   | 0.00   | 0.00   | 0.00   | 0.00 |
| NADP <sup>+</sup> (%)                                          | 100    | 100    | 100    | 100    | 0    |
| NAD <sup>+</sup> (%)                                           | 0      | 0      | 0      | 0      | 0    |

**Supplementary Table 16 | Protein sequence identity comparison of PobA.** CtesDRAFT\_PD2627 (PobA) in *Comamonas testosteroni* KF-1 was compared to PobA in species with previously characterized cofactor preference [30, main text]

| Species                                       | Cofactor Preference | Identity (%) | Accession number |
|-----------------------------------------------|---------------------|--------------|------------------|
| <i>Acinetobacter</i> sp. ADP1                 | NADPH               | 70.95        | WP_004926674.1   |
| <i>Cupriavidus necator</i> JMP134 (synthetic) | NADPH               | 69.92        | AOR50759.1       |
| <i>Pseudomonas aeruginosa</i> PAO1            | NADPH               | 67.87        | WP_003112685.1   |
| <i>Rhizobium leguminosarum</i> B155           | NADPH               | 65.64        | AAA73519         |
| <i>Pseudomonas putida</i> KT2440              | NADPH               | 66.24        | WP_010954394.1   |
| <i>Azotobacter chroococcum</i> ATCC9043       | NADPH               | 65.04        | AAB70835         |

|                                               |         |       |                |
|-----------------------------------------------|---------|-------|----------------|
| <i>Cupriavidus necator</i> JMP134 (synthetic) | NAD(P)H | 53.08 | AOR50758.1     |
| <i>Pseudomonas</i> sp. CBS3                   | NAD(P)H | 52.59 | CAA52824.1     |
| <i>Rhodococcus opacus</i> 557                 | NADH    | 49.49 | ANS30736       |
| <i>Rhodococcus rhodnii</i> 135                | NADH    | 48.59 | KF234627       |
| <i>Corynebacterium glutamicum</i> ATCC 13032  | NAD(P)H | 40.57 | WP_011014104.1 |

**Supplementary Table 17 | Quantitative determination of NADH/FADH<sub>2</sub>, NADPH, and ATP production and consumption.** Absolute rates (mmol g<sub>CDW</sub><sup>-1</sup> h<sup>-1</sup>) were determined from cellular fluxes (Table S10) and species-specific biomass stoichiometry in 4-hydroxybenzoate-grown cells of *C. testosteroni* KF-1.

| CO-FACTOR BALANCES (mmol/gCDW/h) |                           |       |      |
|----------------------------------|---------------------------|-------|------|
| NADH/FADH <sub>2</sub>           |                           | Avg   | SD   |
|                                  | TCA Cycle                 | 34.2  | 0.64 |
|                                  | EMP pathway               | -1.3  | 0.17 |
|                                  | Anabolism                 | 0.7   | 0.03 |
|                                  | Transhydrogenase          | 6.5   | 0.76 |
|                                  | Oxidative Phosphorylation | -40.1 | 1.00 |
| NADPH                            |                           |       |      |
|                                  | TCA Cycle                 | 9.9   | 0.45 |
|                                  | Malic Enzyme              | 8.5   | 0.38 |
|                                  | 4,5-meta                  | 11.1  | 0.09 |
|                                  | 4HB uptake                | -11.6 | 0.09 |
|                                  | Anabolism                 | -11.4 | 0.45 |
|                                  | Transhydrogenase          | -6.5  | 0.76 |
| ATP                              |                           |       |      |
|                                  | TCA Cycle                 | 8.9   | 0.4  |
|                                  | Pyruvate Kinase           | 0.0   | 0.4  |
|                                  | Oxidative Phosphorylation | 60.2  | 1.5  |
|                                  | Anabolism                 | -20.9 | 0.8  |

**Supplementary Table 18 | Comparison of transcriptomics, proteomics, and fluxomics.** Fold changes (Log<sub>2</sub>) of gene transcript levels (transcriptomics), protein abundance (proteomics), and metabolic fluxes (fluxomics) in *C. testosteroni* KF-1 cells grown on 4-hydroxybenzoate relative to cells grown on succinate. Refer to the legend in Fig. 1 for metabolite abbreviations. ND, not detected.

| Reactions                              | Proteins | ORF number       | Transcriptomics | Proteomics | Fluxomics |
|----------------------------------------|----------|------------------|-----------------|------------|-----------|
| Pyruvate → Acetyl-CoA                  | PDH      | CtesDRAFT_PD2531 | 0.681           | 0.174      | 1.107     |
| Acetyl-CoA + OAA -<br>→ Citrate        | GltA     | CtesDRAFT_PD1274 | 0.426           | 0.456      | 1.53      |
| Citrate → Isocitrate                   | AcnB     | CtesDRAFT_PD1285 | 0.43            | 0.221      | 1.474     |
| Citrate → Isocitrate                   | AcnA     | CtesDRAFT_PD1305 | 0.424           | 1.205      | 1.474     |
| isocitrate → α-ketoglutarate           | IDH1     | CtesDRAFT_PD1820 | 0.38            | 0.463      | 1.474     |
| isocitrate → α-ketoglutarate           | IDH2     | CtesDRAFT_PD1824 | -0.41           | -0.223     | 1.474     |
| α-Ketoglutarate → Succinyl-CoA         | Suc      | CtesDRAFT_PD2650 | 0.215           | 0.158      | 1.541     |
| α-Ketoglutarate → Succinyl-CoA         | Suc      | CtesDRAFT_PD2649 | 0.204           | 0.309      | 1.541     |
| α-Ketoglutarate → Succinyl-CoA         | SucA     | CtesDRAFT_PD2651 | 0.229           | 0.182      | 1.541     |
| Succinyl-CoA → Succinate               | SucD     | CtesDRAFT_PD5114 | -0.361          | 0.066      | 1.541     |
| Succinyl-CoA → Succinate               | SucC     | CtesDRAFT_PD5113 | -0.374          | 0.024      | 1.541     |
| Succinate ↔ Fumarate                   | SdhB     | CtesDRAFT_PD1276 | 0.225           | 0.155      | -0.664    |
| Succinate ↔ Fumarate                   | SdhA     | CtesDRAFT_PD1279 | 0.18            | 0.277      | -0.664    |
| Succinate ↔ Fumarate                   | SdhC     | CtesDRAFT_PD1277 | 0.24            | 0.133      | -0.664    |
| Succinate ↔ Fumarate                   | SdhD     | CtesDRAFT_PD1278 | 0.212           | -0.081     | -0.664    |
| Fumarate ↔ malate                      | FumC     | CtesDRAFT_PD3618 | 0.399           | 1.374      | -0.664    |
| Fumarate ↔ malate                      | FH2      | CtesDRAFT_PD3620 | 0.078           | -0.111     | -0.664    |
| Malate ↔ OAA                           | Mdh      | CtesDRAFT_PD1281 | 0.547           | 0.645      | -3.645    |
| Malate = OAA                           | Mqo      | CtesDRAFT_PD1015 | -2.444          | ND         | -3.645    |
| Isocitrate → Succinate +<br>Glyoxylate | AceA     | CtesDRAFT_PD1530 | -0.11           | ND         | ND        |
| Acetyl-CoA + Glyoxylate →<br>Malate    | MS       | CtesDRAFT_PD5335 | 0.578           | 0.832      | ND        |
| Pyruvate → OAA                         | PycB     | CtesDRAFT_PD0191 | 0.029           | ND         | ND        |
| OAA → PEP                              | Pck      | CtesDRAFT_PD5031 | -1.315          | -1.299     | -3.204    |
| PEP → OAA                              | Ppc      | CtesDRAFT_PD1089 | -0.413          | 0.222      | ND        |

|                     |      |                  |        |        |       |
|---------------------|------|------------------|--------|--------|-------|
| Malate <-> Pyruvate | ME   | CtesDRAFT_PD0934 | -0.209 | -0.05  | 3.369 |
| Malate <-> Pyruvate | MaeB | CtesDRAFT_PD5092 | -1.206 | ND     | 3.369 |
| Pyruvate -> PEP     | PEPs | CtesDRAFT_PD3828 | -0.445 | -0.63  | ND    |
| PEP -> Pyruvate     | PK   | CtesDRAFT_PD5271 | 0.271  | 0.341  | ND    |
| PEP <-> 2PG         | Eno  | CtesDRAFT_PD3884 | -0.233 | -0.146 | 0.214 |
| 2PG <-> 3PG         | Gpm  | CtesDRAFT_PD0700 | -0.185 | -0.304 | 0.214 |
| 3PG <-> 1,3-BPG     | Pgk  | CtesDRAFT_PD5167 | -0.645 | -0.595 | 0.232 |
| 1,3-BPG -> GAP      | Gap  | CtesDRAFT_PD5265 | -0.451 | -0.452 | 0.232 |
| GAP <-> DHAP        | TpiA | CtesDRAFT_PD3953 | -0.206 | -0.332 | 0.171 |
| FBP <-> GAP + DHAP  | Fba  | CtesDRAFT_PD5277 | -0.549 | -0.398 | 0.16  |
| FBP -> F6P          | Fbp  | CtesDRAFT_PD1620 | -0.086 | 0.077  | 0.16  |

**Supplementary Table 19 | The Log<sub>2</sub> fold change in the ratio of substrate (S) to product (P) of quantified intracellular metabolites and <sup>13</sup>C-metabolic fluxes.** Cells were grown on 4-hydroxybenzoate (4HB) and compared to growth on succinate (SUCC). The flux ratio for the reaction of pyruvate to PEP could not be calculated because the flux during growth on succinate was zero.

| Reaction              | S to P ratio                | Flux                        |
|-----------------------|-----------------------------|-----------------------------|
|                       | Log <sub>2</sub> (4HB/SUCC) | Log <sub>2</sub> (4HB/SUCC) |
| Pyruvate → Acetyl-CoA | 3.58 ± 0.01                 | 1.11                        |
| Malate → Pyruvate     | -3.26 ± 2.22                | 3.37                        |
| Succinate → Fumarate  | -2.72 ± 0.29                | -0.66                       |
| Fumarate → Malate     | -1.6 ± 0.94                 | -0.66                       |
| Pyruvate → PEP        | 1.49 ± 0.03                 | NF                          |
| PEP → DHAP            | 1.39 ± 0.38                 | 0.23                        |
| F6P → G6P             | -0.06 ± 0.18                | 0.28                        |

**Supplementary Table 20 | Measured allosteric regulation of ME (CtesDRAFT\_PD0934) in the presence of five potential effectors.** Specific activities ( $\text{mmol min}^{-1} \text{g}^{-1}$ ) are reported for each replicate (listed as 1, 2, and 3) as well as the average (Avg)  $\pm$  standard deviation (SD) of the three technical replicates.

|          | Aspartate     | Glutamate     | Succinate     | Fumarate      | aKG           |
|----------|---------------|---------------|---------------|---------------|---------------|
| 0 mM     |               |               |               |               |               |
| 1        | 0.081         |               |               |               |               |
| 2        | 0.080         |               |               |               |               |
| 3        | 0.081         |               |               |               |               |
| Avg ± SD | 0.081 ± 0.001 |               |               |               |               |
| 0.5 mM   |               |               |               |               |               |
| 1        | 0.126         | 0.097         | 0.129         | 0.174         | 0.080         |
| 2        | 0.121         | 0.092         | 0.126         | 0.168         | 0.074         |
| 3        | 0.128         | 0.091         | 0.126         | 0.166         | 0.075         |
| Avg ± SD | 0.125 ± 0.004 | 0.093 ± 0.003 | 0.127 ± 0.002 | 0.169 ± 0.004 | 0.076 ± 0.003 |
| 2 mM     |               |               |               |               |               |
| 1        | 0.153         | 0.108         | 0.164         | 0.181         | 0.082         |
| 2        | 0.147         | 0.106         | 0.156         | 0.173         | 0.074         |
| 3        | 0.149         | 0.105         | 0.157         | 0.172         | 0.077         |
| Avg ± SD | 0.149 ± 0.003 | 0.107 ± 0.002 | 0.159 ± 0.004 | 0.175 ± 0.005 | 0.078 ± 0.004 |

**Supplementary Table 21 | Measured allosteric regulation of MaeB (CtesDRAFT\_PD5092) in the presence of five potential effectors.** Specific activities ( $\text{mmol min}^{-1} \text{g}^{-1}$ ) are reported for each replicate (listed as 1, 2, and 3) as well as the average (Avg)  $\pm$  standard deviation (SD) of the three technical replicates.

|          | Aspartate       | Glutamate | Succinate | Fumarate | aKG   |
|----------|-----------------|-----------|-----------|----------|-------|
| 0 mM     |                 |           |           |          |       |
| 1        | 0.0087          |           |           |          |       |
| 2        | 0.0085          |           |           |          |       |
| 3        | 0.0081          |           |           |          |       |
| Avg ± SD | 0.0084 ± 0.0003 |           |           |          |       |
| 0.5 mM   |                 |           |           |          |       |
| 1        | 0.054           | 0.0112    | 0.0091    | 0.056    | 0.009 |
| 2        | 0.052           | 0.0106    | 0.0084    | 0.051    | 0.008 |
| 3        | 0.050           | 0.0104    | 0.0082    | 0.050    | 0.008 |



|              |                   |                     |                    |                   |                     |
|--------------|-------------------|---------------------|--------------------|-------------------|---------------------|
| Avg $\pm$ SD | 0.052 $\pm$ 0.002 | 0.0108 $\pm$ 0.0004 | 0.0086 $\pm$ 0.005 | 0.052 $\pm$ 0.003 | 0.008 $\pm$ 0.001   |
| <b>2 mM</b>  |                   |                     |                    |                   |                     |
| 1            | 0.0971            | 0.0129              | 0.0108             | 0.092             | 0.0065              |
| 2            | 0.0902            | 0.0126              | 0.0102             | 0.081             | 0.0058              |
| 3            | 0.0875            | 0.0123              | 0.0097             | 0.077             | 0.0057              |
| Avg $\pm$ SD | 0.092 $\pm$ 0.005 | 0.0126 $\pm$ 0.0003 | 0.0103 $\pm$ 0.005 | 0.083 $\pm$ 0.008 | 0.0060 $\pm$ 0.0004 |

**Supplementary Table 22 | Nucleotide sequences of synthetic gene fragments encoding the enzymes studied in this work.**

| Description                                | Sequence (5'→3')                                                                                                                                                                                                                                                                                                                                                                                                                                                                                                                                                                                                                                                                                                                                                                                                                                                                                                                                                                                                                                                                                                                                                                                                     |
|--------------------------------------------|----------------------------------------------------------------------------------------------------------------------------------------------------------------------------------------------------------------------------------------------------------------------------------------------------------------------------------------------------------------------------------------------------------------------------------------------------------------------------------------------------------------------------------------------------------------------------------------------------------------------------------------------------------------------------------------------------------------------------------------------------------------------------------------------------------------------------------------------------------------------------------------------------------------------------------------------------------------------------------------------------------------------------------------------------------------------------------------------------------------------------------------------------------------------------------------------------------------------|
| Malate dehydrogenase (PD1281) Fragment 1/1 | agcaagaagcccgtccgtgtcgcgttaccggcgagctggccaaatcggttacgcccgtgtgtccgcatcgccctcggcgaaatgctgggttaaagatcagcccgttattctgcaactgctggaaatccccgacgaaaaggctcaaacgctctgaaggggcgtgatcatggagctggaagactgcgccttccccctgctggccggcatcgaagcccacgccatcccatgaccgcctcaaggacaccgactacgctctgctgggtggcgcccgtcctcgtggccccggcatggaacgtgctgacctgctggctgccaacgcccagatcttaccgcccagggcaaggctctgaacgccgtggcttcgcgaatgtaaggttcgggtgggtgggaaccccgccaacaccaatgcctacatcgccatgaagtcggctcccgatctgcccgccaagaacttaccgcatgctgcgcctggaccacaaccgtgctgcttcccagctggctgccaagggtggcttcaaggttggcgacatcagggaagctgaccgtgtggggcaaccactgcccaccatgtacgccgactaccgcttcgccaccgtggacggcaagtccgtgaagggaagccatcaacgaccagggaatggaatgcaacgtgttctgcccaccgtgggcaagcgtggcgccgcatcatcgtgctgcgcgtctgctgcgtggctgcttggctgccaacgctgccatcgaccacatgcgtgactgggcccgtgggtccaacggcgaatgggtcaccatgggcgtgacctccaacggcgagtacggcatccccgccgtatcgtgttcggttccccgtgaccaccagggctgacggcgcaatataagattgtcgaaggctctggaatcgatgccttctcgaagagtgcataacaagactctggctgagctgcaaggcgagcaagacggcgtaagcacctgctg                                                                                                                                                                                                            |
| Malic enzyme (PD0934) Fragment 1/2         | acgcaaaatttaagcagtgccggaacaggcacttctgacgctgcccgtgagtaccaccgttcccctgttaaggggcaagattcagtgacgccgacgaaacccttatccaaccagcgtgacctgagcttagcatattacctggcgtagcctatccctgcttgacatcgaagcggatccgagcactgctgctgaatacacgtctcgcggtaatttggtaggcgtcatcaccaatggtacagcagtttgggactgggcgatatcggtccttggcgagcaagcctgtcatggaaggtgaaggggtgtttgttaaagaatttgcgggggtcagctcttcgatcagcttgcgagcgcgaccccataagcttatcgacattatcgctctatggaaccaacacttgaggcatcaacctggaggacatcaagctcctgagtggtttacatcgaaacaggaaactgtcaagcgtatgaacatccctgtattccatgatgaccagcagggacagcaatcattagtcggcagcccttctgaatggcctggaactgtgggttaaggacatcggggcagtcgaagtgccagtcgtatcggcgaggagccgccgtatcgctgtgtagatgtaatggttgacttggaatcaacgcagcaacgtatatatggtagactgaaggggggtatcatgaggggcccccaggcgggttagacgcatcaaaacagcgttatgcacaaaatacgaagcccgactctggcagatgctgttgacggagccgacgtcttttaggatgctcggcccctggggctacttacggcagacatggtaaagacgatggcggaagccatcattctggctctggcaaatcctgagcctgaaatccgtctgaattagcaaaagctattcgctctgattgcattgttgcctacgggtcgtcggactaccggaaccaggtaaacaacgtattatgcttcccctatatcttctgtggtgcgttgactgtgtgtactaagatcacagaggctatgaaattggcttgtgtacgtgagattgccgccctggctaaacaggacgtttcggatgaagttgcggccgataccaaggtaagagttgaccttcggaccggattatctgattccgacaccttctgatactgctgatcttacgtatcggccagcagttgca |
| Malic enzyme (PD0934) Fragment 2/2         | caagctgcggccgaatcaggagtagcaacgcgtccaatcaggacattgccgcgtatcgtgagtccttacgcgtttgtgtatcaaacagtatgtttatgcgccagtgttcggcgagcaaaaggcaaaacttacagcgtgttgctacgcggaaaggtaagacgaacgcgtattacgtgcggttcaagttgcagtagatgatggtctggcgaaagccgatcctgatcggccgtccggctgttatcgaagcccgcattgcaaaggcaggtttgcgcattcagttaggtgaaggtatgcgaaatctgtaatcccagggatgatccacgcttccgtcagctactgggagacgtatcacaaattgatgggacgtaacggagtaactcccgaagctgcgaaggctgcagtgctgcgttcgaatacattgattgccgtttaatggtccatttgggggatgcggacgctatgctgt                                                                                                                                                                                                                                                                                                                                                                                                                                                                                                                                                                                                                                                                                                                                   |

|                                                                   |                                                                                                                                                                                                                                                                                                                                                                                                                                                                                                                                                                                                                                                                                                                                                                                                                                                                                                                                                                                                                                                                                                                                                                                                                                                                                                                                                                                                                                                                                                                                                                                                                                                                                                                                                                                                                                                                                                                                                                                                                                                                                                                                                                                                                                                                                      |
|-------------------------------------------------------------------|--------------------------------------------------------------------------------------------------------------------------------------------------------------------------------------------------------------------------------------------------------------------------------------------------------------------------------------------------------------------------------------------------------------------------------------------------------------------------------------------------------------------------------------------------------------------------------------------------------------------------------------------------------------------------------------------------------------------------------------------------------------------------------------------------------------------------------------------------------------------------------------------------------------------------------------------------------------------------------------------------------------------------------------------------------------------------------------------------------------------------------------------------------------------------------------------------------------------------------------------------------------------------------------------------------------------------------------------------------------------------------------------------------------------------------------------------------------------------------------------------------------------------------------------------------------------------------------------------------------------------------------------------------------------------------------------------------------------------------------------------------------------------------------------------------------------------------------------------------------------------------------------------------------------------------------------------------------------------------------------------------------------------------------------------------------------------------------------------------------------------------------------------------------------------------------------------------------------------------------------------------------------------------------|
|                                                                   | <p>g c g g a t t a g t c g g a c g t t t t g a c t c c c a c t t g g c g c a c c t t g a g g a c g t a t t g g g g t a a a a a g g g g g c a a a c g a a t t g c a a c t g t a a a c g c g g t a a t g t t g g a a a g c g g g a c c c t g t t c g t a g c t g a t a c t t a t a t c a a t g a t g c c c c t t c g g c g g a a g a g t t a g c t g a g a t t g c a a a a t g g c g g c t g a c g a a g t t g c a c g c t t t g g c t t c c c a a a g t t g c a t t c t g t c t a t t c a a a c t a t g g a t c t a g c a c g c g g t t c g g c c g t a a g a t g c g t g c t g c g c a t c t g t t t g c t g c t g c a a a c c c c g g c a t t g a a t g t a c g g a g a g a t g c a c g g c g a c g c c g c g t t a g a t g c c a a t g t t c g c t c a c a c t c g c t t t t g g a g t c c t c t t g a c c g g a g c a g c c a a c g t a c t t a t t t g t c c a a t t t g g a c g c g g c t a a c a t c t t g t t a a t g t c t t a a a a c t a c g g g g g g c a c g g c a c t a c a a t c g g a c c g a t t c t g a t g g g a t g c t c g g c a t c c g c c a t g t c t t g a c t c c a t c a a c a g t g c g t c g c t g t g a a t a t g a c c g c c c t g g c g g c g g c c c a a g c t a t t g c t c t c g t c c t g a</p>                                                                                                                                                                                                                                                                                                                                                                                                                                                                                                                                                                                                                                                                                                                                                                                                                                                                                                                                                                                                                                                   |
| <p>Malic enzyme<br/>(PD5092)<br/>Fragment 1/2</p>                 | <p>t c c g a c a c c a a g c c c a t t a c c t c g a t t g a a a c g t c g t t g c t g c g t c a g g c g g c a c t g g a a t a c a c g a g t t c c c c a a g c c c g g c a a g g t g g c c a t c g c g g c a a c c a a g c c c a t g g c c a a t c a g c a t g a t c t g g c c t g g c t t a c t c g c c c g c g t g g t g c g c c c t g c g a g g a a a t c g t a a g g a c c c g g t g c g g c c t t c a a a t a c a c c a g c c g c g g c a a c c t g g t g g c g t g a t c t c c a a c g g c a c g g c g g t g t g t g g g c c t g g g c g a c a t c g g c g c g t g g c c t c a a g c c c g t a t g g a g g g c a a g g g c g t g t g t t c a a g a a g t t c g c c g c g t c a t g t g t c g a t a t c g a a a t c g a c g a g a a g g a c c c g c a a a g t g t c g a c g t g a t t g t c g c t g g a g c c c a c c t t c g c g c c a t c a a t c t c g a a g a c a t c a a g g c g c c c g a g t g c t t c t g t g a g c g c g a g t g c g c a a g c g a t g a a c a t t c c c g t c t t c c a c g a c g a c c a g c a c g g c a c g g c c a t c a c c g t g g t g c g g c c a t g g t c a a t g c g t c a a g g t c g c c g g c a a g a a g a t c g a a g a g t c a a g t g t g g c g t c g g g t c c c g c c g c g g c g t g g c c t g c c t g a a c c t g c t g t g g a a g t g g t c t g a a g c g c g a a c g t g t t c g t g a c c g a t a t c g c c g c g t g t c a c g a g g c c g c a c c g a g c t g a t g g a c c c g g a c a a g g c g t g t t g c c c a g a a g a c c g a g c t g c g c a c g t g g c g a g g t g a t c g a g g g c g t g a c g c c t c t g g g c c t g t c t g c c g g c a a t g t g t c a a g c a g g a c a t g g t c a g g a a g a t g g c g g c c a g g c c c a t c a t c t c g c g t g g c c a a c c c a a c c g g a a t c a t t c c g a a g a t g t a a g g c g g t c g c g a c g a c g c c a t c a t c g c c a c g g g c c g a c g g a c t a c c c c a a c c a g g t c a a c a a c g t c t g t c t c c c t a t a t c t t c g t g t g c g t g g a c t g c g g c g c g a c c a c c a t c a c c a c c t c g a t g g a g a t c g c t g c g t g c a c g c g a t t g c c g c t g g c c c a g g c g a g c a g t c c g a g g a a g t g g c a g c c c a t g t g g g c g a g g t g c t g a g c t c g c</p>                                         |
| <p>Malic enzyme<br/>(PD5092)<br/>Fragment 2/2</p>                 | <p>c c c g a g t a c c t g a t t c c c a a g c c c t t c g a t c c g c g c t g a t g t g t t g t g g c g c c t g c c g t g g c c c a g g c t g c g g c c g a a g c c g c g t g g c c a a g c g c c c a t c c a g g a c a t g g a t g c c t a c c g c g a g c a t c t g a a g a c c t t c g t c t a c g c c t c c g g c a c c a t g a t g a a g c c c a t c g t g a t c c c g c c a a g a a g g c c t c c a a g a a g c g c g t g g c c t a t g c c g a g g g c g a g g a a g a g c g a t c c t g c g c g c g g c c c a g a t c g t g g t g g a c g a g c g a t t g c g c c c g a c g t g a t c g g c c g c c c c g c a t c a t t g c c c a g c g a t c g a g a a g t t c g g c c t g c g a t g a a g g a a g g c g c c g a c t a c g a c g t g t c a a c g t c g a g c a t g a c g a g c g t a c c g c g a c t t c t g g c a g a g c t a t c a c c g c a t g a c g g a g c g a a g g g c a t c a c c g c g c c a t c g c c a a g a t c g a a a t g c g c g c c g c c t g a c g t g a t c g g t c c a t g t g t g c a c a a g g g c g a g g t c g a c g g c c t g a t c t g c g g c a c c t g g a a c a c a c c a a t g t g c a c c t g a a c t a c a t c g a t c a g g t c a t c g g c a a g c g a g c g c g t g a c c a c c a t g c c t g c a t g a a c g g t c t g t g t g c c c g a g c g c c a g g t a t t c t g t c g a c a c c c a c g t c a a c t a c g a c c c a c g g c g a g c a g t t g g c c g a g a t c a c c a t c a t g g c c g c g a g g a a a t g a t g c g t t c g g t a t c a a g c c a a g g t g c g t g t g a g c c a c t c c a a c t t c g g t c c a g c a a c c a g c c t a g c c c g t c a a g a t g c g c c a g a c c c t g g a g c t g t c g c g a g c a g g c a c c c t g g t g g a a g t g g a t g g c g a a a t g c a c g g c g a t g t g g c t g t g a c g g c a a g g c c g c g c c a a g c t a t g c c c a a c a g c a c g t g t g g t g a t g c c a a c c t g t g t g t c g c c c a a t a t c g a c g c c g c c a a c a t c a t c g a c g c c g c c a a c a t c a g t a c a a c t t g t c a a g c a g g c g g c g g c g g c g g c a t t g c c g t g g g c c c g t g t g t g g g t g c g g c c a a g c c c g t g c a t g t g t g a c g c c c a g c a c c a c g g t g c c c g t a t c t g a a c a t g a c g c c a c c a c g t c a g c c g t t a a</p> |
| <p>Isocitrate<br/>dehydrogenase<br/>(PD1820)<br/>Fragment 1/2</p> | <p>a g t a c g c a g c a a c c a c c a t c a t c t a c a c t t g a c t g a c g a g g t c c c c g c c t g g c t a c c a g c g c a t t c t g c c c g t g a t c c g t c t t c g c a c c g g c c g g c a t c a a t g t g g a g a c c a g c g a t a t c t c g t g g c a g g c c g t a t c t t g g g c g a g t t c c c g a c t t t t g a c c g a a g c c c a a c g c g t c c g a a c a a c t g g t g a a c t g g c a a g c t g a c g t g a c c c t g a a g c c a a c a t c a a a g t g c c c a a t a t c c g c a t c c g t g g c c a g c t g c a a g a a g c g a t c a a g g a a t t g a g g g c a a g g g t a c g c c a t c c c c g a c t a t c t g a a a c c g c c a c g a c c a t c c g a a a a g g a c a t c a a g g c a c g t a c a a c a g g t g c a t c g c c t g c c g t g a a c c c c g t g c g c g a a g g c a a c t c g g a t c g c c g c g c g c c t g c g g t c a a g a a c t a c g c c a a g a a g c a c c c c a t t c a t g g g t g a g t g g a a g c a g t g g t c g a a a c c a t g t g t c g c a c a t g g a a g a g g c g a c t t c a c c a c g g c g a a a g t c a t g a c g t g g a c a a g g c c c g c g a a g t g a a g a t g g t g c t g g a g a c c a a t c c g g c a a c a g c a t c g t t t g a a g g a c a a g t c a a g c t g c a g g c t g c a g a a g t g a t c g a t t c a t g t t c a t g a g c a a g a a g c c t t g t g c g t t t c a t g a a a a g g a a a t c g a a g a c t c c c g c g a g t c g g c g a t c t t g t c t c g t g c a c g t g a a g g c c a c a t g a a g g t g t c c c a c c c a t c g t t t c g g t c a c t g c g t a a g a t t t c a c a a g g a a g c c t t c g a a</p>                                                                                                                                                                                                                                                                                                                                                                                                                                                                                                                                                                                                                                                           |

|                                                         |                                                                                                                                                                                                                                                                                                                                                                                                                                                                                                                                                                                                                                                                                                                                                                                                                                                                                                                                                                                                                                                                                                                                                                                                                                                                                                                                 |
|---------------------------------------------------------|---------------------------------------------------------------------------------------------------------------------------------------------------------------------------------------------------------------------------------------------------------------------------------------------------------------------------------------------------------------------------------------------------------------------------------------------------------------------------------------------------------------------------------------------------------------------------------------------------------------------------------------------------------------------------------------------------------------------------------------------------------------------------------------------------------------------------------------------------------------------------------------------------------------------------------------------------------------------------------------------------------------------------------------------------------------------------------------------------------------------------------------------------------------------------------------------------------------------------------------------------------------------------------------------------------------------------------|
|                                                         | agcacggcaagctgtttgatcagctggcgctgaacgtgaacaatggcatggccaatctgtacgagaagattgagacc<br>ctgcctgcttcgcagcgcgaagaatcatccgtgacctgcacaagtgccaggagcaccgtccacgtctggccatggt<br>cgattccgccaaaggcatcaccaacttccactcgcccaa                                                                                                                                                                                                                                                                                                                                                                                                                                                                                                                                                                                                                                                                                                                                                                                                                                                                                                                                                                                                                                                                                                                        |
| Isocitrate<br>dehydrogenase<br>(PD1820)<br>Fragment 2/2 | cgacgtgatcgtggatgcttccatgcccgccatgatccgcgtggcgccgaagatgtggccgctgacggcaagcct<br>tacgactgcaaggccgtgatgcctgagtcacaccttggccgtatctaccaggaaagtgatcaactctgcaagtggcac<br>ggcaacttcgaccccaagaccatgggcaccgtgcccaacgtgggtctgatggcgcaaaaggccgaagagtacggc<br>tcgcacgacaagacgtttgagatcgccgaagacggcgtggccaacatcgtggacatcgccaccggcgaaagtctg<br>ctgagccagaacgtggaagtggcgacatctggcgcatgtgccaggtcaaggatgtcctatccgcgactgggtga<br>agctggctgtgacccgtcccgcgaactccggcatgctgctgttctgctggacccctatcgtccccacgaagcc<br>gagctgatcaagaagggtgcagacctactgaaggaaatcgacaccaacggcctggaaatccacatcctctcgcaagt<br>gcgcgccatgcgctacacgtggagcgcgtggcccgcggtctggacaccatttcgggtgaccggcaacattctcgct<br>gactacctgaccgacctgtcccgttctggaactgggcacctcgccaagatgctgccatcgtgctttgatggccg<br>gtggcgcatgtacgaaaccgtgcaggcggtccgctccaagcatgtgcagcagctgtgtggaagaaaaccacc<br>tgcgtgggactcgtgggtgaattcctggccctggcgtctcgttgaagacctgggcatcaaggaaaacaatgcc<br>gcgcaagctgctggcaagactctgataagccaccggcaagctgttgacgaggacaagtcgcttcgctcg<br>caccggcgagctggacaaccgtggtcgcagttctacatcgtctgtactgggccaggtctgctgctcagagcg<br>aagatgcgggaactggcgccaagttcgccactctggctaaaactctggccgagaacgaagccaagatcgtggcg<br>agatgaagggaagtgaaggcaaggctgccgatcggcggtactacatgcccgacgtggccaagctggacgccg<br>tgatcgccccagcgccacctcaacgcggccatcgctcggtgtaa                                                                   |
| Isocitrate<br>dehydrogenase<br>(PD1824)<br>Fragment 1/1 | agcacgtccagcacatccaggttccgcccaggggggagaagatcagcgtcaacgcgggacaagacactgaatgtt<br>ccgaatcaacccatcattccgttcacgagggcgatggtgtcgggttgatgtgacgccgggtgatcgcaaggtggct<br>gacgtgcccgttgccaaggtatatggcggcgagcgcaagattgcctggatggaggtgatcggggtgagaaggcca<br>cgcgcatctacggccccgatgtctggctgccgaggaaaccgtggctgccgtgcgcgactatgccgtgtccatcaa<br>gggcccgtgaccacgcccgtggcgggcgcatccgctcgtgaacgtggcgctgcgccaggagctggacctgt<br>atgtctgctgcgccccgtgcagtactcaaggcggtgccttcgccgtcaaggagcccgagaagacaaatatggtg<br>atctcccgagaaactcgaggacatctacggggcatcgaatacggcccgagcgagaaggcgaaaaagctc<br>atcgacttcttgccaaggaattggcgccaacaagatccgcttcccgaacctcgggcatcgggatcaagcccgt<br>ctcgcgaggggtacggagcgctggtgcgaaggccatccagtacgccatcgacaaacaagaagcccagcgtga<br>ccctgttcacaagggaacatcatgaagtacacggaaggcgcttccgtgactggggctacgcgctggcgacgc<br>cgagttcggtgccgagctgatcgacggcgcccatggtgcgcatcaagcaccgaaagacgggcaaggacatcat<br>catcaaggactcgtacaccgacgcttctgcagcagattctgatcgccccggccgaatattcggtgtggccacgt<br>caacctcaacggcgactacatctcggtatgcgtggccgcgcaggtggcggggacggcattgtctccggtgccaat<br>ctgtcggagagcattgcttgcgaagccaccacggcacggcgccgctatgcgggcaaggactatgtgaacc<br>ccggctccatgattttgtcgccgagatgatgtcgccacatgggctggcgcgaggcagcgatctgatcgtcgag<br>tcgctggaaaaagccatccagagcaagcatgtgacctacgactttcccgcctgatggacggagcgaccaggttct<br>atgctcgggcttcggggatgtggtgatctcgatgatggactga |
| 4-HB<br>3-monooxygenase<br>(PD2627)<br>Fragment 1/1     | cgtacacaagtcgccatcatcggtgcccgttcctcgggttctgctgctgggagcgttctctacaaggcgggcatcga<br>caacatcatcatcgagcagcgacgcggcactatgtgctggcgccatccgcgccggcgctgctggagcaggtgac<br>ggtggatctgctcaagcaggcggtgcccgaagcgcataatgaggaaggtctgcctcacgatggcatcgagctg<br>ctgttcaagggaagcgtcatcgatcgacctcaacggcctgaccggcggaagcgcgatggtgtacggccaga<br>ccgaagtcacccgtgacctgatggaagtgcgtcccaggagggttgaccacggtgtacgagggcagtcacgtgc<br>agcccgtggacttcgagagcgacaagcccaagggtgcgttacgaaaagacggccaggtgcacgagatcgaatgc<br>gacttcacgcccgttgcgacggctttcacggcatctgccgcgccagcgcgctcaggacaagatcaagacctcga<br>gaaggtctatcccttcggctggctgggctgctctccgatacggcccgtgctgcacgagctgatctacgcaaac<br>cgaacgcggcttggcctgtgcagccagcgacgcccacgcgcagccgctactatctcaggtgccgtgaccga<br>caaggtcgaggactggagcgtgaagcgttctgggaagagctcaagaagcgctggacccccgaagcgcgccga<br>atctggtgaccggcccttcgtggagaaaagcattgcaccgctgcgcagcttctgtaccgagcccatcgcttccg<br>gcatgttctgcccggcgacggcggccacatcgtgcctccacaggcgccaaggcgctgaacctggcggttccg<br>atgtaggctatctgtcgcaagccttctgagattaccaggaacagtcggaagccggcatcgatcgctactccgagc<br>agtgcctcgctcgctgtggaaggccgagcggttctcctggtgatgacctccatcgtgcacaacttccccggcgaag                                                                                                                                                                                                       |

|                                                               |                                                                                                                                                                                                                                                                                                                                                                                                                                                                                                                                                                                                                                                                                                                                                                                                                                                                                                                                                                                                                                                                                                                                                                                                                                                                                                                        |
|---------------------------------------------------------------|------------------------------------------------------------------------------------------------------------------------------------------------------------------------------------------------------------------------------------------------------------------------------------------------------------------------------------------------------------------------------------------------------------------------------------------------------------------------------------------------------------------------------------------------------------------------------------------------------------------------------------------------------------------------------------------------------------------------------------------------------------------------------------------------------------------------------------------------------------------------------------------------------------------------------------------------------------------------------------------------------------------------------------------------------------------------------------------------------------------------------------------------------------------------------------------------------------------------------------------------------------------------------------------------------------------------|
|                                                               | gcgagttcaacaccaaggtgcaggaagcagagctggactacatcgtccactccgagggccggtccacctcgtggc<br>cgagaactatgtgggtctgcctctggtgtaa                                                                                                                                                                                                                                                                                                                                                                                                                                                                                                                                                                                                                                                                                                                                                                                                                                                                                                                                                                                                                                                                                                                                                                                                         |
| Phosphoenol-<br>pyruvate synthase<br>(PD3828)<br>Fragment 1/2 | tctcaactcttcgaagcgaccgcattagctgttcgtcgaaaaactgcgcatgaccgacgtcgaagtcggtcggcggc<br>aagaacgcctcgctcggcgagatgatttcgcaactgccccagggcggtgcgcgtgcctaccggctttgccaccacgg<br>cccatgccttcgcgagttcctggcctttgaaggtctggccggcaagatctctgccaagctggccgctctggacgtgg<br>acgatgtccgcgcccgcgcgtgtcggcgcgaaattcgtgccatggtggaaagccagcctttccctgccgatctg<br>gaacaggccatccgcgaggaattgtccgtctgcaaggcggaatccgagggatcgtttgcggtgcgctcttcggc<br>cactgcagaagacctgcccgatgcctcgtttgccggccagcaggaaaccttctgaacgtgttgggcatcgaagacg<br>tgtgcacaagatgaaggaggtgttcgctcgtttacaacgaccgcgcatctcctaccgctgcacaagggttcg<br>agcacgatgtggtggccctgtccgcccggcgtgcagcgcatggtgcgttcgacaaggcgctgccggcgatgtt<br>caccatcgacaccgaatccggttgcagggaagtgtcttcacacctccagctacggcctggggcgagaccgtggtgc<br>aggcgcggtgaaccccgacgagttctatgtgcacaagccatgctcaaggctggcaacaaggcactgatccgcc<br>gcaatctgggtccaagctgatccagatgatctttgccacggcgaggaaaaggcgccgacggcaagctgtgcaa<br>gaccaccgatgtggtcacgaactgcgcaaccgctattcgtgaccgacgaggaggtgcagcaactggcgattac<br>gcgctggtgatcgagcagcattatggcgtcccatggatatcaatggggcaaggacggcaccgacggccagctct<br>acatctgcaggcgccctgaaaccgtgaagagccagtcgaaggacaggccgagctgcgtacaagctcaag<br>ggcacgggacaccgtgctggccgaaggccgcccacgggtcagaagatcggtaccggccccgtgcgctggtgtc<br>cgacatctgcagatggatcaggtgcaggccggcgacgtgctggtgaccgacatgaccgatcccaactgggagcc<br>cgtcatgaagaaggcttcggc |
| Phosphoenol-<br>pyruvate synthase<br>(PD3828)<br>Fragment 2/2 | catcgtcaccaaccgcggtggccgtacctgccacggcccatcattgcacgcgagctgggtatccctgccgttggtg<br>gctgcggcaatgaaccgatctgctcaaggccgaaactggttacgtgtcctgtgcggaaggcgataccggcaa<br>gatctatgatggtctgctggaaaccgaagtgcagcgaggtcaagcgtggcgagatgccagcatccccaccaagatc<br>atgatgaacgtgggcaatccccagctggccttcgactttgccagctgccaacgaaggcggtgggtctggcccgcct<br>ggaattcatcatcaacaacaatatcggtgtccacccaaggccatctgactaccccgccgttgacgccgatctgaa<br>gaaggccgtcgagtcctggcccgcggccatgcattccccgcgcgttctacgtggacaagggtgaccgaaggcgt<br>ggcaacgattgccgcccgtttctggcccaagcccgtgatcgtgcgcatgtccgacttaagtcacaacgaataccgca<br>agctcatcgccggcagccgttacgagcccaggaagagaaccccatgctgggcttccgcggtgacgcggttacat<br>ctcggcagagttcggcgaagcctcaagatggaatgcgaagccctgctccgcgtgcgtgaggacatgggtctgacc<br>aacgtcaagatcatgatccccctcgtgcgtaccctgggccaggccaagcgctgactgagctgctggccgaaaacg<br>gcctcaagcgcgccgaaaatggcctgcagctgatcatgatgtgcgaagtgcctccaacgcccgtgctggccgagga<br>gttctcgaatacttcgacggcttctccgtgggtcccaacgacctgaccagctgacctgggcttgatcgcgactc<br>cggctcggagctgctggccgccgacttcgacgagcgcgaccccgccgtaagaagctgctggctcgcgccatcaa<br>ggcctgccgcatcagaacaagtatgtgggcatctgcggccaaggcccttcggaccacccgacttcgccaagtgg<br>ctggccgatgaggccatctcctcatctccctgaaccctgacagcgtggtctccacctggcagaagctggctgaataa                                                                                          |

**Supplementary Table 23 | Nucleotide sequences of primers used for plasmid construction.**

| Name              | Sequence (5'→3')                  | Description                                                                                                       |
|-------------------|-----------------------------------|-------------------------------------------------------------------------------------------------------------------|
| pET28a-F          | ATCTCTTCuGAGCACCACCACCACC         | Amplification of pET-28a(+)-TEV for USER cloning, forward                                                         |
| pET28aNt-R        | ATGGCCCuGAAAATAAAGATTCTCGCC GCT   | Amplification of pET-28a(+)-TEV for USER cloning with Nt His-tag, reverse                                         |
| pET28aCt-R        | AGAGCCCAuGGTATATCTCCTTCTTAAAG     | Amplification of pET-28a(+)-TEV for USER cloning with Ct His-tag, reverse                                         |
| <i>Mdh</i> 1281-F | ATGGGCTCuAGCAAGAAGCCCGTCCGT GT    | Amplification of PD1281 for USER cloning into pET28a(+)-TEV in-phase with Ct His-tag, removes ATG, forward        |
| <i>Mdh</i> 1281-R | AGAAGAGAuCAGCAGGTGCTTGACGCC GTCTT | Amplification of PD1281 for USER cloning into pET28a(+)-TEV in-phase with Ct His-tag, removes Stop codon, reverse |

|                       |                                     |                                                                                                                       |
|-----------------------|-------------------------------------|-----------------------------------------------------------------------------------------------------------------------|
| <i>me0934_1/2-F</i>   | AGGGCCAuACGCAAAATTTAAGCAGTGC        | Amplification of PD0934 fragment 1 for USER cloning into pET28a(+)-TEV in-phase with Nt His-tag, removes ATG, forward |
| <i>me0934_1/2-R</i>   | AGCTTGuGCAACTGCTGGGGCGATA           | Amplification of PD0934 fragment 1 for USER cloning into pET28a(+)-TEV in-phase with Nt His-tag, reverse              |
| <i>me0934_2/2-F</i>   | ACAAGCuGCGGCCGAATCAGGAGTA           | Amplification of PD0934 fragment 2 for USER cloning into pET28a(+)-TEV in-phase with Nt His-tag, forward              |
| <i>me0934_2/2-R</i>   | AGAAGAGAuTCAGGAACGAAGAGCAATAGC      | Amplification of PD0934 fragment 2 for USER cloning into pET28a(+)-TEV in-phase with Nt His-tag, reverse              |
| <i>me5092_1/2-F</i>   | AGGGCCAuTCCGACACCAAGCCCATTACC       | Amplification of PD5092 fragment 1 for USER cloning into pET28a(+)-TEV in-phase with Nt His-tag, removes ATG, forward |
| <i>me5092_1/2-R</i>   | AGGTACuCGGGGCCGAAGCTCAGCACC TC      | Amplification of PD5092 fragment 1 for USER cloning into pET28a(+)-TEV in-phase with Nt His-tag, reverse              |
| <i>me5092_2/2-F</i>   | AGTACCuGATTCCCAAGCCCTTCGA           | Amplification of PD5092 fragment 2 for USER cloning into pET28a(+)-TEV in-phase with Nt His-tag, forward              |
| <i>me5092_2/2-R</i>   | AGAAGAGAuTTAACGGCTGACGTTGGC         | Amplification of PD5092 fragment 2 for USER cloning into pET28a(+)-TEV in-phase with Nt His-tag, reverse              |
| <i>idh1820_1/2-F</i>  | AGGGCCAuAGTACGCAGCAACCCACCA T       | Amplification of PD1820 fragment 1 for USER cloning into pET28a(+)-TEV in-phase with Nt His-tag, removes ATG, forward |
| <i>idh1820_1/2-R</i>  | ACGTCGTuGGGCGAGTGGAAGTTGGTG AT      | Amplification of PD1820 fragment 1 for USER cloning into pET28a(+)-TEV in-phase with Nt His-tag, reverse              |
| <i>idh1820_2/2-F</i>  | AACGACGuGATCGTGATGCTTCCATG C        | Amplification of PD1820 fragment 2 for USER cloning into pET28a(+)-TEV in-phase with Nt His-tag, forward              |
| <i>idh1820_2/2-R</i>  | AGAAGAGAuTTACACCGACGCGATGGC         | Amplification of PD1820 fragment 2 for USER cloning into pET28a(+)-TEV in-phase with Nt His-tag, reverse              |
| <i>idh1824-F</i>      | AGGGCCAuAGCACGTCCCAGCACATCC A       | Amplification of PD1824 for USER cloning into pET28a(+)-TEV in-phase with Nt His-tag, removes ATG, forward            |
| <i>idh1824-R</i>      | AGAAGAGAuTCAGTCCATCATCGAGAT CACCACA | Amplification of PD1824 for USER cloning into pET28a(+)-TEV in-phase with Nt His-tag, reverse                         |
| <i>4hb3mon2627-F</i>  | AGGGCCAuCGTACACAAGTCGCCATCA TC      | Amplification of PD2627 for USER cloning into pET28a(+)-TEV in-phase with Nt His-tag, removes ATG, forward            |
| <i>4hb3mon2627-R</i>  | AGAAGAGAuTTACACCAGAGGCAGACC CA      | Amplification of PD2627 for USER cloning into pET28a(+)-TEV in-phase with Nt His-tag, reverse                         |
| <i>peps3828_1/2-F</i> | AGGGCCAuTCTCAACTCTTCAAGCGA CC       | Amplification of PD3828 fragment 1 for USER cloning into pET28a(+)-TEV in-phase with Nt His-tag, removes ATG, forward |
| <i>peps3828_1/2-R</i> | AAGCCTuCTTCATGACGGGCTCCCAGTT        | Amplification of PD3828 fragment 1 for USER cloning into pET28a(+)-TEV in-phase with Nt His-tag, reverse              |

|                       |                                   |                                                                                                                |
|-----------------------|-----------------------------------|----------------------------------------------------------------------------------------------------------------|
| <i>peps3828_2/2-F</i> | AAGGCTuCGGCCATCGTCACCAACCGC<br>GG | Amplification of PD3828 fragment 2 for<br>USER cloning into pET28a(+)-TEV in-phase<br>with Nt His-tag, forward |
| <i>peps3828_2/2-R</i> | AGAAGAGAuTTATTCAGCCAGCTTCTG<br>CC | Amplification of PD3828 fragment 2 for<br>USER cloning into pET28a(+)-TEV in-phase<br>with Nt His-tag, reverse |

**Supplementary Table 24 | Primer sequences used for strain engineering.**

| Primer  | Sequence                    |
|---------|-----------------------------|
| oALC831 | TAGATGCCTGCAAGTCGAGCGGC     |
| oALC832 | TTCCTCCGGCCAATACAAGCGCATG   |
| oALC833 | AAGAGGAATACCGCGCCATGATG     |
| oALC834 | TTCGCCACACATCAATGACAATGGG   |
| oALC837 | GTGATGAAGGAACGCTTGCTGTCTG   |
| oALC839 | GATCAGACCTGGAATTGTGAGCGG    |
| oALC840 | TTCGTTTTGACTAGATGGTTGCCC    |
| oALC841 | GAGAGCACCAGATCCACCTTGC      |
| oALC874 | ATCTGTGGGCGGTGAGATGTGG      |
| oALC875 | TGGAAGAAGTCGCCGTTGGG        |
| oALC880 | CGACAGGAATGTGCAGGGATCG      |
| oALC882 | CCTGTGGGTGACGTATTTTCATGGG   |
| oALC883 | CGTCTATCTAAAAAGTTTCAGTGCGCG |
| oALC884 | TCACTACTACGACGACACCAAGCG    |
| oALC885 | AGACGATGGGGATGTTGACCG       |
| oALC886 | ATGAGCCACCAGTTGCAGGG        |
| oALC887 | ATACAGATCGTCGTAGCGGGCC      |
