# Supplementary material for: Complex regulation in a Comamonas platform for diverse aromatic carbon metabolism
Source: Nat Chem Biol. 2023 Feb 6;19(5):651–62. doi: 10.1038/s41589-022-01237-7 (PMC10154247; doi:10.1038/s41589-022-01237-7)
Supplement: Supplementary file 3 — DNA synthesis and plasmid sequences for plasmid construction and statistical information for Fig. 1b,c. [file 41589_2022_1237_MOESM3_ESM.xlsx]

## Sheet: PlasmidConstruction
DNA synthesis and plasmid sequences
Plasmid	Synthesized sequence	Vector backbone	Final sequenence	US homology region*	DS homology region*	Ptac Promoter sequence	LacO sequence	RBS sequence	Gene 1	Gene 1 sequence**	2nd RBS sequence	Gene 2	Gene 2 sequence**	L3S1P13 terminator sequence
pALC783	GAGGCTGGCCGGCCCGTTCAGCCGATTGAGCCGAATCCGCGCATTACGCCTCTTTACGCTTCGAGATGGATACAGGTCAGCGGGAACCGGCTCTGGCGCGTTAAGGGCTTAAGCGTTTCCGGGTTGAAGCGCGATCTCGCCGGCCCCACGGTGATCTCAATCGAGCATGGAGACATATGTCCAATCGCACTTCACTCACTCGCTGCCTGGCGGCCCTGGCGCTGGTTTGCGCAGCGGGTGCCGCCCAGGCCCAGGCCTATATCAGTGGCTCCGTTTCCGGGCAGCTGGCGCCCGGGGTTTACGGTCAGGTCAATATCGGCAATGCGCCGCCGCAGGTGCTTTATGCCCAGCCGATGTGGGGCGGCCCGGTGGTGCCGCAGGTGCAGCCCATCTATATGT…	pK18mobsacB	CCGGATGAATGTCAGCTACTGGGCTATCTGGACAAGGGAAAACGCAAGCGCAAAGAGAAAGCAGGTAGCTTGCAGTGGGCTTACATGGCGATAGCTAGACTGGGCGGTTTTATGGACAGCAAGCGAACCGGAATTGCCAGCTGGGGCGCCCTCTGGTAAGGTTGGGAAGCCCTGCAAAGTAAACTGGATGGCTTTCTTGCCGCCAAGGATCTGATGGCGCAGGGGATCAAGATCTGATCAAGAGACAGGATGAGGATCGTTTCGCATGATTGAACAAGATGGATTGCACGCAGGTTCTCCGGCCGCTTGGGTGGAGAGGCTATTCGGCTATGACTGGGCACAACAGACAATCGGCTGCTCTGATGCCGCCGTGTTCCGGCTGTCAGCGCAGGGGCGCCC…	2,053,265-2,054,322	2,063,202-2,064,256	-	-	-	-	-	-	-	-	-
pALC784	GAGGCTGGCCGGCCCGTTCAGCCGATTGAGCCGAATCCGCGCATTACGCCTCTTTACGCTTCGAGATGGATACAGGTCAGCGGGAACCGGCTCTGGCGCGTTAAGGGCTTAAGCGTTTCCGGGTTGAAGCGCGATCTCGCCGGCCCCACGGTGATCTCAATCGAGCATGGAGACATATGTCCAATCGCACTTCACTCACTCGCTGCCTGGCGGCCCTGGCGCTGGTTTGCGCAGCGGGTGCCGCCCAGGCCCAGGCCTATATCAGTGGCTCCGTTTCCGGGCAGCTGGCGCCCGGGGTTTACGGTCAGGTCAATATCGGCAATGCGCCGCCGCAGGTGCTTTATGCCCAGCCGATGTGGGGCGGCCCGGTGGTGCCGCAGGTGCAGCCCATCTATATGT…	pK18mobsacB	CCGGATGAATGTCAGCTACTGGGCTATCTGGACAAGGGAAAACGCAAGCGCAAAGAGAAAGCAGGTAGCTTGCAGTGGGCTTACATGGCGATAGCTAGACTGGGCGGTTTTATGGACAGCAAGCGAACCGGAATTGCCAGCTGGGGCGCCCTCTGGTAAGGTTGGGAAGCCCTGCAAAGTAAACTGGATGGCTTTCTTGCCGCCAAGGATCTGATGGCGCAGGGGATCAAGATCTGATCAAGAGACAGGATGAGGATCGTTTCGCATGATTGAACAAGATGGATTGCACGCAGGTTCTCCGGCCGCTTGGGTGGAGAGGCTATTCGGCTATGACTGGGCACAACAGACAATCGGCTGCTCTGATGCCGCCGTGTTCCGGCTGTCAGCGCAGGGGCGCCC…	2,053,265-2,054,322	2,054,323-2,055,327	AGTCTCTATGGAGGTCAGGTATGATTACTATTGACAATTAATCATCGGCTCGTATAATGTGATCAGACC	TGGAATTGTGAGCGGATAACAATT	CTTAAGATTAACTCACACAGGAGATATCAT	-	-	-	-	-	-
pALC785	AGTCTCTATGGAGGTCAGGTATGATTACTATTGACAATTAATCATCGGCTCGTATAATGTGATCAGACCTGGAATTGTGAGCGGATAACAATTACGCGAAGGTTAAGGAGGTATTTTTATGGCATTGGAGAAACCGTATTTGGACGTGCCGGGAACCATCATCTTCGATGCGGAGCAAAGCAGGAAAGGTTACTGGCTCAATCAGTTCTGTATGTCGTTGATGAAGGCGGAGAATCGAGAGAGGTTCCGGGCCAATGAAAGGGCGTACTTGGATGAGTGGGCGATGACCGAGGAACAGAAACAAGCGGTACTCGCACGAGATTTGAACTGGTGCATGAGGACGGGCGGAAACATTTACTTCTTGGCCAAGATCGGTGCCACGGACGGGAAAAGCTTCCA…	pBBR1	TCGCGCGTTTCGGTGATGACGGTGAAAACCTCTGACACATGCAGCTCCCGGAGACGGTCACAGCTTGTCTGTAAGCGGATGCCGGGAGCAGACAAGCCCGTCAGGGCGCGTCAGCGGGTGTTGGCGGGTGTCGGGGCTGGCTTAACTATGCGGCATCAGAGCAGATTGTACTGAGAGTGCACCATATGCGGTGTGAAATACCGCACAGATGCGTAAGGAGAAAATACCGCATCAGGCGCCATTCGCCATTCAGGCTGCGCAACTGTTGGGAAGGGCGATCGGTGCGGGCCTCTTCGCTATTACGCCAGCTGGCGAAAGGGGGATGTGCTGCAAGGCGATTAAGTTGGGTAACGCCAGGGTTTTCCCAGTCACGACGTTGTAAAACGACGGCCAGAGAAT…	-	-	AGTCTCTATGGAGGTCAGGTATGATTACTATTGACAATTAATCATCGGCTCGTATAATGTGATCAGACC	TGGAATTGTGAGCGGATAACAATT	ACGCGAAGGTTAAGGAGGTATTTTT	pmdA	ATGGCATTGGAGAAACCGTATTTGGACGTGCCGGGAACCATCATCTTCGATGCGGAGCAAAGCAGGAAAGGTTACTGGCTCAATCAGTTCTGTATGTCGTTGATGAAGGCGGAGAATCGAGAGAGGTTCCGGGCCAATGAAAGGGCGTACTTGGATGAGTGGGCGATGACCGAGGAACAGAAACAAGCGGTACTCGCACGAGATTTGAACTGGTGCATGAGGACGGGCGGAAACATTTACTTCTTGGCCAAGATCGGTGCCACGGACGGGAAAAGCTTCCAGCAGATGGCAGGCAGCATGACGGGGATGACGGAAGAGGAATACCGCGCCATGATGATGGGTGGTGGCAGGAGCGCAGAGGGCAACAGGTATGTTGGGGAAGATGGCGACGCCCAAGCA…	GACGAGCATTCATTAAGGAGGTTTATTT	pmdB	ATGGCCCGGATCACCGCCAGCGTATTCACGTCGCACGTGCCGGCGATCGGGGCAGCGATGGACATGGGAAAGACACAGGAAGCCTACTGGGCGCCACTGTTTAAAGGATATGACTTTTCGCGGCAATGGATGAAGGACAACAAGCCTGATGTGATCTTCTTGGTGTATAACGACCATGCCACCGCATTCAGCTTGGATTGCATTCCAACGTTTGCGATTGGCACCGCGGCCGAGTTCCAGCCCGCGGACGAGGGATGGGGACCTCGGCCAGTGCCAAAGGTCGTCGGGCACCCCGATCTCGCCTCACATATTGCACAGTCCGTAATCCAACAAGACTTCGACCTGACAATTGTGAATAAGATGGACGTGGATCACGGACTCACGGTCCCATTGTCATTG…	GACGAACAATAAGGCCTCCCTAACGGGGGGCCTTTTTTATTGATAACAAAA
pALC786	AGTCTCTATGGAGGTCAGGTATGATTACTATTGACAATTAATCATCGGCTCGTATAATGTGATCAGACCTGGAATTGTGAGCGGATAACAATTGGGAGACTTTTAAGGAGGTATATTTATGAGCGCATTTGAGAAGACGCCGGGCTGGATGGACTGGTACGCAAACCCGAGCAAGCCCCAATTCAAACTGCCGGCCGGCGCAGTCGACGCACACTGCCATGTGTTCGGTCCTGGTAATGAATTCCCCTTTGCGCCTGAACGCAAATATACCCCTTGTGACGCCTCCAAAGCGCAGCTGTACGCCTTGCGCGACCACTTGGGTTTCGCACGGAATGTCGTCGTTCAAGCAACCTGCCACGGTGCCGACAACCGCGCCATGGTAGATGCCTGCAAGTCGAG…	pBBR1	TCGCGCGTTTCGGTGATGACGGTGAAAACCTCTGACACATGCAGCTCCCGGAGACGGTCACAGCTTGTCTGTAAGCGGATGCCGGGAGCAGACAAGCCCGTCAGGGCGCGTCAGCGGGTGTTGGCGGGTGTCGGGGCTGGCTTAACTATGCGGCATCAGAGCAGATTGTACTGAGAGTGCACCATATGCGGTGTGAAATACCGCACAGATGCGTAAGGAGAAAATACCGCATCAGGCGCCATTCGCCATTCAGGCTGCGCAACTGTTGGGAAGGGCGATCGGTGCGGGCCTCTTCGCTATTACGCCAGCTGGCGAAAGGGGGATGTGCTGCAAGGCGATTAAGTTGGGTAACGCCAGGGTTTTCCCAGTCACGACGTTGTAAAACGACGGCCAGAGAAT…	-	-	AGTCTCTATGGAGGTCAGGTATGATTACTATTGACAATTAATCATCGGCTCGTATAATGTGATCAGACC	TGGAATTGTGAGCGGATAACAATT	GGGAGACTTTTAAGGAGGTATATTT	pmdD	ATGAGCGCATTTGAGAAGACGCCGGGCTGGATGGACTGGTACGCAAACCCGAGCAAGCCCCAATTCAAACTGCCGGCCGGCGCAGTCGACGCACACTGCCATGTGTTCGGTCCTGGTAATGAATTCCCCTTTGCGCCTGAACGCAAATATACCCCTTGTGACGCCTCCAAAGCGCAGCTGTACGCCTTGCGCGACCACTTGGGTTTCGCACGGAATGTCGTCGTTCAAGCAACCTGCCACGGTGCCGACAACCGCGCCATGGTAGATGCCTGCAAGTCGAGCGGCGGGAAAGCACGCGGTGTGGCGACAGTTAAAAGGAGCATCAGCGACGCGGAGCTGAGCGCCCTCCACGACGCCGGGGTCAGGGGAGTGCGATTTAATTTCGTTAAACGCTTGGTC…	-	-	-	GACGAACAATAAGGCCTCCCTAACGGGGGGCCTTTTTTATTGATAACAAAA
*NCBI Reference Sequence: NZ_AAUJ02000001.1
**gene from NZ_AAUJ02000001.1 codon optimized for expression in P. putida by Salis lab tool

## Sheet: Statistical Information
Statistical information (p and n) for the figures in this study.
Fig. 1b- One-Way ANOVA					Fig. 1c- One-Way ANOVA
Condition	Comparison	P-value			Condition	Comparison	P-value
Df Sum Sq Mean Sq F value Pr(>F)					Df Sum Sq Mean Sq F value Pr(>F)
Condition 3 0.12922 0.04307 30.44 1e-04 ***					Condition 3 3212 1070.7 34.26 6.5e-05 ***
Residuals 8 0.01132 0.00142					Residuals 8 250 31.3
Fig. 1b- Tukey HSD post hoc tests					Fig. 1c	Tukey HSD post hoc tests
Condition	Comparison	P-value			Condition	Comparison	P-value
Succinate	4HB	0.0923691			Succinate	4HB	0.0002762
Succinate	VAN	0.001352			Succinate	VAN	0.35468
Succinate	TER	0.0273295			Succinate	TER	0.912044
4HB	VAN	9.84e-05			4HB	VAN	6.17e-05
4HB	TER	0.0009435			4HB	TER	0.0005144
VAN	TER	0.147912			VAN	TER	0.150988
